# Supplementary material for: A nuclear role for the DEAD-box protein Dbp5 in tRNA export
Source: eLife. 2019 Aug 27;8:e48410. doi: 10.7554/eLife.48410 (PMC6711706; doi:10.7554/eLife.48410)
Supplement: Supplementary file 1. — Table 1: List of lethal point mutations in Dbp5, Table 2: results of the SGA analysis of dbp5-L12A and dbp5-R423A, Table 3: DBP5 mutagenesis oligo sequences, Table 4: Yeast Strains, Table 5: Plasmids, and Table 6: sequences of qPCR primers, FISH probes, and Northern probes. [file elife-48410-supp1.xlsx]

## Sheet: Info
		A nuclear role for the DEAD-box protein Dbp5 in tRNA export
		A. Lari, A. Arul Nambi Rajan, R. Sandhu, T. Reiter, R. Montpetit, B.P. Young, C. J. Loewen, and B. Montpetit
									Supplemental File 1
			Table 1. Lethal dbp5 alleles
			Table 2. Synthetic gene array analysis of dbp5-L12A and dbp5-R423A
			Table 3. DBP5 mutagenesis oligo sequences
			Table 4. Yeast Strains
			Table 5. Plasmids
			Table 6. qPCR primers, FISH probes, and Northern probes

## Sheet: Table 1
Table 1. Lethal dbp5 alleles
Lethal alleles
dbp5-F94A
dbp5-Q119A
dbp5-N133A
dbp5-G141A
dbp5-G143A
dbp5-K144A
dbp5-F148A
dbp5-R172A
dbp5-E173A
dbp5-D239A
dbp5-E240A
dbp5-D242A
dbp5-R256A
dbp5-Y325A
dbp5-K340A
dbp5-Y347A
dbp5-K349A
dbp5-R369A
dbp5-K382A
dbp5-T387A
dbp5-N388A
dbp5-R392A
dbp5-G393A
dbp5-R4236A
dbp5-R429A

## Sheet: Table 2
Table 2. Synthetic gene array analysis of dbp5-L12A and dbp5-R423A
Term:	Description:
Gene	Standard gene name
Ctr	Average normalized colony size of control strain
Exp	Average normalized colony size of double mutant
Ratio	Average ratio of Exp to Ctr
Ratio <p	Number of replicates in which the ratio is below the low cut-off value (p)
Diff	Average normalized experimental colony size minus average normalized colony size
p-value	p-value from a paired t-test
Hit	When the ratio is below the low cut-off value (p) in 3/3 (L12A) or 5/6 (R423A) of the independent SGA replicates and p-value is <0.05
dbp5-L12A SGA results
Gene	Ctrl	Exp	Ratio	Ratio < p	Diff	p-value	Hit?	Description
SRF1	1.05726	0.05	0.0472919	3/3	-1.05726	0.000331036	Yes	Regulator of phospholipase D (Spo14p); interacts with Spo14p and regulates its catalytic activity; capable of buffering the toxicity of C16:0 platelet activating factor, a lipid that accumulates intraneuronally in Alzheimer's patients
YAR029W	0.636168	0.05	0.0785955	3/3	-0.636168	0.0129829	Yes	Member of DUP240 gene family but contains no transmembrane domains; green fluorescent protein (GFP)-fusion protein localizes to the cytoplasm in a punctate pattern
BEM1	0.567251	0.05	0.0881444	3/3	-0.567251	0.00662682	Yes	Protein containing SH3-domains, involved in establishing cell polarity and morphogenesis; functions as a scaffold protein for complexes that include Cdc24p, Ste5p, Ste20p, and Rsr1p
LRP1	0.791185	0.404217	0.5109	3/3	-0.386968	0.0059689	Yes	Nuclear exosome-associated nucleic acid binding protein; involved in RNA processing, surveillance, degradation, tethering, and export; homolog of mammalian nuclear matrix protein C1D involved in regulation of DNA repair and recombination
THP1	0.839017	0.507058	0.604347	3/3	-0.33196	0.0159506	Yes	Nuclear pore-associated protein, forms a complex with Sac3p that is involved in transcription and in mRNA export from the nucleus; contains a PAM domain implicated in protein-protein binding
SLX9	0.89754	0.614928	0.685125	3/3	-0.282613	0.00449933	Yes	Protein required for pre-rRNA processing; associated with the 90S pre-ribosome and 43S small ribosomal subunit precursor; interacts with U3 snoRNA; deletion mutant has synthetic fitness defect with an sgs1 deletion mutant
SHS1	0.237344	0.05	0.210665	3/3	-0.237344	0.00624655	Yes	One of five related septins (Cdc3p, Cdc10p, Cdc11p, Cdc12p, Shs1p) that form a cortical filamentous collar at the mother-bud neck which is necessary for normal morphogenesis and cytokinesis
BUD25	0.929762	0.725753	0.78058	3/3	-0.204008	0.00821289	Yes	Protein involved in bud-site selection; diploid mutants display a random budding pattern instead of the wild-type bipolar pattern
COG1	0.302285	0.153956	0.509308	3/3	-0.148329	0.00173786	Yes	Essential component of the conserved oligomeric Golgi complex (Cog1p through Cog8p), a cytosolic tethering complex that functions in protein trafficking to mediate fusion of transport vesicles to Golgi compartments
SHP1	0.448318	0.324448	0.7237	3/3	-0.12387	0.0159481	Yes	UBX (ubiquitin regulatory X) domain-containing protein that regulates Glc7p phosphatase activity and interacts with Cdc48p; interacts with ubiquitylated proteins in vivo and is required for degradation of a ubiquitylated model substrate
MDM20	0.380768	0.258669	0.679335	3/3	-0.122099	0.01165	Yes	Non-catalytic subunit of the NatB N-terminal acetyltransferase, which catalyzes N-acetylation of proteins with specific N-terminal sequences; involved in mitochondrial inheritance and actin assembly
SPE2	0.264779	0.169172	0.638918	3/3	-0.095607	0.0470859	Yes	S-adenosylmethionine decarboxylase, required for the biosynthesis of spermidine and spermine; cells lacking Spe2p require spermine or spermidine for growth in the presence of oxygen but not when grown anaerobically
dbp5-R423A SGA results
Gene	Ctrl	Exp	Ratio	Ratio < p	Diff	p-value	Hit?	Description
STD1	1.06555	0.05	0.0469751	6/6	-1.01555	1.62666e-08	Yes	Protein involved in control of glucose-regulated gene expression; interacts with kinase Snf1p, glucose sensors Snf3p and Rgt2p, TATA-binding Spt15p; regulator of transcription factor Rgt1p; interactions with Pma1p appear to propagate [GAR+]; STD1 has a paralog, MTH1, that arose from the whole genome duplication
SLX9	0.994185	0.064951	0.0654746	6/6	-0.929234	4.51155e-08	Yes	Protein required for pre-rRNA processing; associated with the 90S pre-ribosome and 43S small ribosomal subunit precursor; interacts with U3 snoRNA; deletion mutant has synthetic fitness defect with an sgs1 deletion mutant
RSB1	1.07542	0.162996	0.154635	6/6	-0.91242	9.58117e-05	Yes	Putative sphingoid long-chain base (LCB) efflux transporter; integral membrane transporter that localizes to the plasma membrane and may transport long chain bases (LCBs) from the cytoplasmic side toward the extracytoplasmic side of the membrane; role in glycerophospholipid translocation; suppressor of the sphingoid LCB sensitivity of an LCB-lyase mutation
NUP120	1.04933	0.164683	0.161415	6/6	-0.884644	0.000773396	Yes	Subunit of the Nup84p subcomplex of the nuclear pore complex (NPC); contributes to nucleocytoplasmic transport and NPC biogenesis and is involved in establishment of a normal nucleocytoplasmic concentration gradient of the GTPase Gsp1p; also plays roles in several processes that may require localization of genes or chromosomes at the nuclear periphery, including double-strand break repair, transc…
CIN5	1.08377	0.325971	0.300255	6/6	-0.757794	0.00648352	Yes	Basic leucine zipper (bZIP) transcription factor of the yAP-1 family; physically interacts with the Tup1-Cyc8 complex and recruits Tup1p to its targets; mediates pleiotropic drug resistance and salt tolerance; nuclearly localized under oxidative stress and sequestered in the cytoplasm by Lot6p under reducing conditions; CIN5 has a paralog, YAP6, that arose from the whole genome duplication
ETT1	1.04352	0.290344	0.286562	6/6	-0.753172	0.00593094	Yes	Nuclear protein that inhibits replication of Brome mosaic virus; S. cerevisiae is a model system for studying replication of positive-strand RNA viruses in their natural hosts; deletion increases stop codon readthrough
YNL140C	1.11338	0.367354	0.339049	6/6	-0.746028	0.00547972	Yes	Protein of unknown function; expressed at both mRNA and protein levels; partially overlaps THO2/YNL139C
NUP60	1.04756	0.383165	0.365368	6/6	-0.6644	4.1755e-07	Yes	FG-nucleoporin component of central core of the nuclear pore complex; contributes directly to nucleocytoplasmic transport and maintenance of the nuclear pore complex (NPC) permeability barrier and is involved in gene tethering at the nuclear periphery; relocalizes to the cytosol in response to hypoxia; both NUP1 and NUP60 are homologous to human NUP153
SAC3	0.997849	0.341215	0.338729	6/6	-0.656634	0.00360612	Yes	mRNA export factor; required for biogenesis of the small ribosomal subunit; component of TREX-2 complex (Sac3p-Thp1p-Sus1p-Cdc31p) involved in transcription elongation and mRNA export from the nucleus; involved in post-transcriptional tethering of active genes to the nuclear periphery and to non-nascent mRNP; similar to the human germinal center-associated nuclear protein (GANP)
NUP84	0.821112	0.181973	0.224148	6/6	-0.639138	2.35567e-05	Yes	Subunit of the Nup84p subcomplex of the nuclear pore complex (NPC); contributes to nucleocytoplasmic transport and NPC biogenesis; also plays roles in several processes that may require localization of genes or chromosomes at the nuclear periphery, including double-strand break repair, transcription and chromatin silencing; homologous to human NUP107
THP2	1.00882	0.380206	0.396024	5/6	-0.628611	0.0200148	Yes	Subunit of the THO and TREX complexes; THO connects transcription elongation and mitotic recombination, and TREX is recruited to activated genes and couples transcription to mRNA export; involved in telomere maintenance
VHS3	1.0174	0.397918	0.393039	6/6	-0.61948	0.0117288	Yes	Negative regulatory subunit of protein phosphatase 1 Ppz1p; involved in coenzyme A biosynthesis; subunit of the phosphopantothenoylcysteine decarboxylase (PPCDC; Cab3p, Sis2p, Vhs3p) complex and the CoA-Synthesizing Protein Complex (CoA-SPC: Cab2p, Cab3p, Cab4p, Cab5p, Sis2p and Vhs3p)
PFA4	1.07222	0.465329	0.433591	6/6	-0.606894	0.0103094	Yes	Palmitoyltransferase with autoacylation activity; required for palmitoylation of amino acid permeases containing a C-terminal Phe-Trp-Cys site; required for modification of Chs3p; member of the DHHC family of putative palmitoyltransferases
TMC1	1.05092	0.449338	0.425658	5/6	-0.601579	0.0205461	Yes	AN1-type zinc finger protein, effector of proteotoxic stress response; stress-inducible transcriptional target of Rpn4p; induced by nitrogen limitation, weak acid, misfolded proteins; short-lived protein, degraded by proteasome; may protect cells from trivalent metalloid induced proteotoxicity; contains PACE promoter element; ortholog of human AIRAP, which stimulates proteasome activity in respon…
IRC23	1.07389	0.472457	0.449299	6/6	-0.601431	0.0123619	Yes	Protein of unknown function; green fluorescent protein (GFP)-fusion localizes to the ER; null mutant displays increased levels of spontaneous Rad52p foci; IRC23 has a paralog, BSC2, that arose from the whole genome duplication
HST3	0.880526	0.291945	0.345089	6/6	-0.588581	0.00723256	Yes	Member of the Sir2 family of NAD(+)-dependent protein deacetylases; involved along with Hst4p in telomeric silencing, cell cycle progression, radiation resistance, genomic stability and short-chain fatty acid metabolism
CUE5	1.16785	0.600455	0.51745	6/6	-0.567396	0.000730864	Yes	Ubiquitin-binding protein; functions as ubiquitin-Atg8p adaptor in ubiquitin-dependent autophagy; serves as proteaphagy receptor for inactivated 26S proteasomes; contains CUE domain that binds ubiquitin, which may facilitate intramolecular monoubiquitination; CUE5 has a paralog, DON1, that arose from the whole genome duplication; human TOLLIP is a functional CUE-domain homolog, can complement yea…
AUS1	1.06217	0.509988	0.482857	6/6	-0.552187	0.0197878	Yes	Plasma membrane sterol transporter of the ATP-binding cassette family; required, along with Pdr11p, for uptake of exogenous sterols and their incorporation into the plasma membrane; activity is stimulated by phosphatidylserine; sterol uptake is required for anaerobic growth because sterol biosynthesis requires oxygen; AUS1 has a paralog, PDR11, that arose from the whole genome duplication
CKA2	0.995503	0.458454	0.461057	6/6	-0.537049	0.014516	Yes	Alpha' catalytic subunit of casein kinase 2 (CK2); CK2 is a Ser/Thr protein kinase with roles in cell growth and proliferation; CK2, comprised of CKA1, CKA2, CKB1 and CKB2, has many substrates including transcription factors and all RNA polymerases; protein abundance increases in response to DNA replication stress; regulates Fkh1p-mediated donor preference during mating-type switching
HTZ1	0.871076	0.340304	0.388395	6/6	-0.530772	0.00240615	Yes	Histone variant H2AZ; exchanged for histone H2A in nucleosomes by the SWR1 complex; involved in transcriptional regulation through prevention of the spread of silent heterochromatin; Htz1p-containing nucleosomes facilitate RNA Pol II passage by affecting correct assembly and modification status of RNA Pol II elongation complexes and by favoring efficient nucleosome remodeling
CTK3	0.601637	0.0721831	0.119711	6/6	-0.529453	2.36151e-05	Yes	Gamma subunit of C-terminal domain kinase I; CTDK-I phosphorylates RNA polymerase II subunit Rpo21p to affect transcription and pre-mRNA 3' end processing, and also phosphorylates ribosomal protein Rps2p to increase translational fidelity; protein abundance increases in response to DNA replication stress
YOR029W	1.02208	0.498657	0.489869	5/6	-0.523423	0.0224298	Yes	Putative protein of unknown function; conserved among S. cerevisiae strains; YOR029W is not an essential gene
STI1	1.07877	0.558543	0.520954	6/6	-0.520226	0.0265676	Yes	Hsp90 cochaperone; regulates spatial organization of amyloid-like proteins in the cytosol, thereby buffering the proteotoxicity caused by amyloid-like proteins; interacts with the Ssa group of the cytosolic Hsp70 chaperones and activates Ssa1p ATPase activity; interacts with Hsp90 chaperones and inhibits their ATPase activity; homolog of mammalian Hop
LSM1	1.04614	0.538813	0.51719	6/6	-0.507329	0.000744115	Yes	Lsm (Like Sm) protein; forms heteroheptameric complex (with Lsm2p, Lsm3p, Lsm4p, Lsm5p, Lsm6p, and Lsm7p) involved in degradation of cytoplasmic mRNAs; also enters the nucleus and positively regulates transcription initiation; unlike most Sm-like proteins, Lsm1p requires both its SM-domain and C-terminal domain for RNA-binding; binds to mRNAs under glucose starvation, most often in the 3' UTR; fo…
MDM12	0.833742	0.327106	0.388628	5/6	-0.506635	0.0082059	Yes	Mitochondrial outer membrane protein, ERMES complex subunit; required for transmission of mitochondria to daughter cells; required for mitophagy; may influence import and assembly of outer membrane beta-barrel proteins; ERMES complex is often co-localized with peroxisomes and with concentrated areas of pyruvate dehydrogenase
HMS1	1.08937	0.59561	0.54835	6/6	-0.493763	0.0146389	Yes	bHLH protein with similarity to myc-family transcription factors; overexpression confers hyperfilamentous growth and suppresses the pseudohyphal filamentation defect of a diploid mep1 mep2 homozygous null mutant
CYC2	0.939976	0.451525	0.486858	5/6	-0.488451	0.0242305	Yes	Mitochondrial peripheral inner membrane protein; contains a FAD cofactor in a domain exposed in the intermembrane space; exhibits redox activity in vitro; likely participates in ligation of heme to acytochromes c and c1 (Cyc1p and Cyt1p)
TOM6	1.07804	0.598977	0.553589	5/6	-0.479067	0.0222664	Yes	Component of the TOM (translocase of outer membrane) complex; responsible for recognition and initial import steps for all mitochondrially directed proteins; promotes assembly and stability of the TOM complex
FMP52	0.584741	0.109932	0.163653	5/5	-0.474809	0.00200848	Yes	Protein of unknown function; localized to the mitochondrial outer membrane; induced by treatment with 8-methoxypsoralen and UVA irradiation
EXP1	0.936668	0.484365	0.5205	6/6	-0.452302	0.00317724	Yes	Putative protein of unknown function; green fluorescent protein (GFP)-fusion protein localizes to the endoplasmic reticulum; YDL121C is not an essential protein
YOR019W	1.13663	0.688411	0.601184	6/6	-0.448214	0.03509	Yes	Protein of unknown function; may interact with ribosomes, based on co-purification experiments; YOR019W has a paralog, JIP4, that arose from the whole genome duplication
THR1	0.905428	0.457327	0.506626	6/6	-0.448101	0.00524171	Yes	Homoserine kinase; conserved protein required for threonine biosynthesis; long-lived protein that is preferentially retained in mother cells and forms cytoplasmic filaments; expression is regulated by the GCN4-mediated general amino acid control pathway
LPX1	1.11277	0.667065	0.598694	6/6	-0.445708	0.0193749	Yes	Peroxisomal matrix-localized lipase; required for normal peroxisome morphology; contains a peroxisomal targeting signal type 1 (PTS1) and a lipase motif; peroxisomal import requires the PTS1 receptor, Pex5p and self-interaction; transcriptionally activated by Yrm1p along with genes involved in multidrug resistance; oleic acid inducible
DFG16	0.880946	0.435532	0.493362	6/6	-0.445415	0.000141927	Yes	Probable multiple transmembrane protein; involved in diploid invasive and pseudohyphal growth upon nitrogen starvation; is glycosylated and phosphorylated; interacts with Rim21p and Rim9p in the plasma membrane to form a pH-sensing complex in the Rim101 pathway and is required to maintain Rim21p levels; required for accumulation of processed Rim101p
ALG8	0.975467	0.532097	0.548686	6/6	-0.44337	0.0185373	Yes	Glucosyl transferase; involved in N-linked glycosylation; adds glucose to the dolichol-linked oligosaccharide precursor prior to transfer to protein during lipid-linked oligosaccharide biosynthesis; similar to Alg6p; human homolog ALG8 can complement yeast null mutant
SHE4	0.714223	0.271845	0.396672	5/6	-0.442378	0.0100656	Yes	Protein containing a UCS (UNC-45/CRO1/SHE4) domain; binds to myosin motor domains to regulate myosin function; involved in endocytosis, polarization of the actin cytoskeleton, and asymmetric mRNA localization
SET4	0.93618	0.499836	0.495401	5/6	-0.436344	0.0366182	Yes	Protein of unknown function, contains a SET domain; SET4 has a paralog, SET3, that arose from the whole genome duplication
RTS1	0.826407	0.406576	0.501759	5/6	-0.419831	0.0241832	Yes	B-type regulatory subunit of protein phosphatase 2A (PP2A); Rts1p and Cdc55p are alternative regulatory subunits for PP2A catalytic subunits, Pph21p and Pph22p; PP2A-Rts1p protects cohesin when recruited by Sgo1p to the pericentromere; highly enriched at centromeres in the absence of Cdc55p; required for maintenance of septin ring organization during cytokinesis, for ring disassembly in G1 and fo…
YNG1	1.09266	0.673369	0.622305	5/6	-0.419289	0.0472525	Yes	Subunit of the NuA3 histone acetyltransferase complex; this complex acetylates histone H3; contains PHD finger domain that interacts with methylated histone H3; shares significant sequence identity with the human candidate tumor suppressor p33-ING1 in C-terminal region
CTK1	0.606435	0.188712	0.313804	6/6	-0.417722	0.000212112	Yes	Catalytic (alpha) subunit of C-terminal domain kinase I (CTDK-I); phosphorylates both RNA pol II subunit Rpo21p to affect transcription and pre-mRNA 3' end processing, and ribosomal protein Rps2p to increase translational fidelity; required for H3K36 trimethylation but not dimethylation by Set2p; suggested stimulatory role in 80S formation during translation initiation; similar to the Drosophila …
CTK2	0.632227	0.217293	0.347902	6/6	-0.414934	0.000351417	Yes	Beta subunit of C-terminal domain kinase I (CTDK-I); which phosphorylates both RNA pol II subunit Rpo21p to affect transcription and pre-mRNA 3' end processing, and ribosomal protein Rps2p to increase translational fidelity; relocalizes to the cytosol in response to hypoxia
SFM1	1.12072	0.706793	0.630806	6/6	-0.413928	0.0393192	Yes	SPOUT methyltransferase; catalyzes omega-monomethylation of Rps3p on Arg-146; not an essential gene; predicted to be involved in rRNA processing and ribosome biogenesis and in biopolymer catabolism
NUP133	0.905934	0.4935	0.557292	6/6	-0.412434	0.00466778	Yes	Subunit of Nup84p subcomplex of nuclear pore complex (NPC); contributes to nucleocytoplasmic transport, NPC biogenesis; is involved in establishment of a normal nucleocytoplasmic concentration gradient of GTPase Gsp1p; also plays roles in several processes that may require localization of genes or chromosomes at nuclear periphery, including double-strand break repair, transcription and chromatin …
GEP4	0.640198	0.229675	0.356654	6/6	-0.410523	0.00107393	Yes	Mitochondrial phosphatidylglycerophosphatase (PGP phosphatase); dephosphorylates phosphatidylglycerolphosphate to generate phosphatidylglycerol, an essential step during cardiolipin biosynthesis; null mutant is sensitive to tunicamycin, DTT
CKB2	0.809066	0.403547	0.499913	6/6	-0.405519	0.00302203	Yes	Beta' regulatory subunit of casein kinase 2 (CK2); a Ser/Thr protein kinase with roles in cell growth and proliferation; CK2, comprised of CKA1, CKA2, CKB1 and CKB2, has many substrates including transcription factors and all RNA polymerase
BUD31	0.881084	0.47749	0.548883	6/6	-0.403594	0.011224	Yes	Component of the SF3b subcomplex of the U2 snRNP; increases efficiency of first and second step pre-mRNA splicing; diploid mutants display a random budding pattern instead of the wild-type bipolar pattern; facilitates passage through G1/S Start, but is not required for G2/M transition or exit from mitosis
MRPL10	0.72481	0.331708	0.450879	5/5	-0.393102	0.0227103	Yes	Mitochondrial ribosomal protein of the large subunit; appears as two protein spots (YmL10 and YmL18) on two-dimensional SDS gels
PET8	1.15831	0.768517	0.65707	6/6	-0.389789	0.0365182	Yes	S-adenosylmethionine transporter of the mitochondrial inner membrane; member of the mitochondrial carrier family; required for biotin biosynthesis and respiratory growth
LPD1	1.07986	0.690808	0.643405	6/6	-0.389052	0.0335384	Yes	Dihydrolipoamide dehydrogenase; the lipoamide dehydrogenase component (E3) of the pyruvate dehydrogenase and 2-oxoglutarate dehydrogenase multi-enzyme complexes; PDH complex is concentrated in spots within the mitochondrial matrix, often near the ERMES complex and near peroxisomes; LPD1 has a paralog, IRC15, that arose from the whole genome duplication
RPL27A	0.604788	0.222533	0.371524	6/6	-0.382255	0.00500102	Yes	Ribosomal 60S subunit protein L27A; homologous to mammalian ribosomal protein L27, no bacterial homolog; RPL27A has a paralog, RPL27B, that arose from the whole genome duplication
MDM31	0.698434	0.324998	0.505347	6/6	-0.373436	0.00872781	Yes	Mitochondrial protein that may have a role in phospholipid metabolism; inner membrane protein with similarity to Mdm32p; required for normal mitochondrial morphology and inheritance; interacts genetically with MMM1, MMM2, MDM10, MDM12, and MDM34
IPK1	0.829086	0.455838	0.553084	6/6	-0.373247	0.000376573	Yes	Inositol 1,3,4,5,6-pentakisphosphate 2-kinase; nuclear protein required for synthesis of 1,2,3,4,5,6-hexakisphosphate (phytate), which is integral to cell function; has 2 motifs conserved in other fungi; ipk1 gle1 double mutant is inviable; human IPPK can complement ipk1 null mutant
BUB3	0.792933	0.4259	0.530542	6/6	-0.367033	0.00859814	Yes	Kinetochore checkpoint WD40 repeat protein; localizes to kinetochores during prophase and metaphase, delays anaphase in the presence of unattached kinetochores; forms complexes with Mad1p-Bub1p and with Cdc20p, binds Mad2p and Mad3p; functions at kinetochore to activate APC/C-Cdc20p for normal mitotic progression
YOR015W	1.05194	0.685553	0.654463	5/6	-0.366385	0.0472763	Yes	Putative protein of unknown function; conserved among S. cerevisiae strains; YOR015W is not an essential gene
SWR1	0.876025	0.510211	0.596496	6/6	-0.365814	0.0076876	Yes	Swi2/Snf2-related ATPase; structural component of the SWR1 complex, which exchanges histone variant H2AZ (Htz1p) for chromatin-bound histone H2A; relocalizes to the cytosol in response to hypoxia; chronological aging factor that mediates lifespan extension by dietary restriction
IZH2	1.10365	0.738544	0.672948	6/6	-0.365103	0.0232915	Yes	Plasma membrane receptor for plant antifungal osmotin; involved in zinc ion homeostasis, apoptosis; negatively regulates ZRT1 and other functionally divergent genes through CCCTC promoter motif (IzRE); modulates FET3 activity in iron-independent manner; affects gene expression by influencing balance of competition between Msn2p/Msn4p and Nrg1p/Nrg2p for binding to IzRE; transcription regulated by…
VPS72	0.926399	0.561575	0.607317	6/6	-0.364824	0.000403872	Yes	Htz1p-binding component of the SWR1 complex; exchanges histone variant H2AZ (Htz1p) for chromatin-bound histone H2A; may function as a lock that prevents removal of H2AZ from nucleosomes; required for vacuolar protein sorting
PFK1	0.429376	0.0672386	0.161049	6/6	-0.362137	8.17982e-05	Yes	Alpha subunit of heterooctameric phosphofructokinase; involved in glycolysis, indispensable for anaerobic growth, activated by fructose-2,6-bisphosphate and AMP, mutation inhibits glucose induction of cell cycle-related genes
BUR2	0.404488	0.05	0.124709	6/6	-0.354488	4.46872e-06	Yes	Cyclin for the Sgv1p (Bur1p) protein kinase; Sgv1p and Bur2p comprise the CDK-cyclin BUR kinase complex which is involved in transcriptional regulation through its phosphorylation of the carboxy-terminal domain (CTD) of the largest subunit of RNA polymerase II (Rpo21p); BUR kinase is also involved in the recruitment of Spt6p to the CTD at the onset of transcription
RCY1	0.420145	0.0730838	0.192433	6/6	-0.347061	0.00068506	Yes	F-box protein involved in recycling endocytosed proteins; involved in recycling plasma membrane proteins internalized by endocytosis; localized to sites of polarized growth; direct interaction with C-terminal cytoplasmic region of Drs2p plays an important role for Drs2p function in endocytic recycling pathway
APQ12	0.818789	0.473264	0.580335	6/6	-0.345525	0.00165433	Yes	Nuclear envelope/ER integral membrane protein; interacts and functions with Brr6p and Brl1p in lipid homeostasis; mutants are defective in nuclear pore complex biogenesis, nuclear envelope morphology, mRNA export from the nucleus and are sensitive to sterol biosynthesis inhibitors and membrane fluidizing agents; exhibits synthetic lethal genetic interactions with genes involved in lipid metabolism
NUP2	1.2298	0.893273	0.730005	6/6	-0.336531	0.000418099	Yes	Nucleoporin involved in nucleocytoplasmic transport; binds to either the nucleoplasmic or cytoplasmic faces of the nuclear pore complex depending on Ran-GTP levels; also has a role in chromatin organization
THP1	0.840689	0.512225	0.612663	6/6	-0.328464	0.00646205	Yes	Nuclear pore-associated protein; component of TREX-2 complex (Sac3p-Thp1p-Sus1p-Cdc31p) involved in transcription elongation and mRNA export from the nucleus; involved in post-transcriptional tethering of active genes to the nuclear periphery and to non-nascent mRNP; contains a PAM domain implicated in protein-protein binding
RPS7A	0.498349	0.192677	0.386647	6/6	-0.305672	0.000834128	Yes	Protein component of the small (40S) ribosomal subunit; interacts with Kti11p; deletion causes hypersensitivity to zymocin; homologous to mammalian ribosomal protein S7, no bacterial homolog; RPS7A has a paralog, RPS7B, that arose from the whole genome duplication
PEP7	0.866117	0.56437	0.651712	6/6	-0.301747	4.08156e-05	Yes	Adaptor protein involved in vesicle-mediated vacuolar protein sorting; multivalent adaptor protein; facilitates vesicle-mediated vacuolar protein sorting by ensuring high-fidelity vesicle docking and fusion, which are essential for targeting of vesicles to the endosome; required for vacuole inheritance
SPT10	0.829842	0.534636	0.657007	5/6	-0.295206	0.00210599	Yes	Histone H3 acetylase with a role in transcriptional regulation; sequence-specific activator of histone genes, binds specifically and cooperatively to pairs of UAS elements in core histone promoters, functions at or near TATA box; involved in S phase-specific acetylation of H3K56 at histone promoters, which is required for recruitment of SWI/SNF nucleosome remodeling complex and subsequent transcr…
ARP6	0.961467	0.6668	0.692998	6/6	-0.294667	0.000355025	Yes	Actin-related protein that binds nucleosomes; a component of the SWR1 complex, which exchanges histone variant H2AZ (Htz1p) for chromatin-bound histone H2A
MDM32	0.533192	0.242773	0.456374	6/6	-0.290419	0.000642357	Yes	Mitochondrial inner membrane protein with similarity to Mdm31p; required for normal mitochondrial morphology and inheritance; interacts genetically with MMM1, MDM10, MDM12, and MDM34; variation between SK1 and S288C at residues 182 and 262 impacts invasive growth and mitochondrial network structure
LIP2	0.890076	0.608526	0.688557	6/6	-0.28155	0.000994312	Yes	Lipoyl ligase; involved in the modification of mitochondrial enzymes by the attachment of lipoic acid groups
SIT4	0.442995	0.161886	0.370005	6/6	-0.281109	0.0022449	Yes	Ceramide-activated, type 2A-related serine-threonine phosphatase; functions in G1/S transition of mitotic cycle; controls lifespan, mitochondrial function, cell cycle progression by regulating HXK2 phosphorylation; regulator of COPII coat dephosphorylation; required for ER to Golgi traffic; interacts with Hrr25p kinase; cytoplasmic and nuclear protein that modulates functions mediated by Pkc1p in…
IWR1	0.511376	0.23512	0.449423	6/6	-0.276257	0.00328942	Yes	RNA polymerase II transport factor, conserved from yeast to humans; also has a role in transporting RNA polymerase III into the nucleus; interacts with most of the RNAP II subunits; nucleo-cytoplasmic shuttling protein; deletion causes hypersensitivity to K1 killer toxin; protein increases in abundance and relocalizes from nucleus to cytoplasm upon DNA replication stress
SEM1	0.921623	0.646716	0.70574	6/6	-0.274907	0.00797535	Yes	19S proteasome regulatory particle lid subcomplex component; role in Ub-dependent proteolysis and proteasome stability; involved in TREX-2 mediated mRNA export, and in the prevention of transcription-associated genome instability; ubiquitinated by Nedd4-like E3-ligase, Rsp5p; human ortholog DSS1, a BRCA1 binding protein implicated in cancer, complements the yeast null; drives trinucleotide repeat…
PSD1	0.69773	0.424419	0.611406	6/6	-0.273311	0.00106031	Yes	Phosphatidylserine decarboxylase of the mitochondrial inner membrane; converts phosphatidylserine to phosphatidylethanolamine; regulates mitochondrial fusion and morphology by affecting lipid mixing in the mitochondrial membrane and by influencing the ratio of long to short forms of Mgm1p; partly exposed to the mitochondrial intermembrane space; autocatalytically processed
IRC10	1.13992	0.869243	0.766481	5/6	-0.270677	0.0134028	Yes	Protein of unknown function; subunit of the leading edge protein (LEP) complex (Ssp1-Ady3-Don1-Irc10) that forms a ring-like structure at the leading edge of the prospore membrane during meiosis II; null mutant displays increased levels of spontaneous Rad52p foci
SPT4	0.361615	0.0947247	0.298151	5/5	-0.26689	0.00755118	Yes	Spt4p/5p (DSIF) transcription elongation factor complex subunit; the Spt4/5 complex binds to ssRNA in a sequence-specific manner, and along with RNAP I and II has multiple roles regulating transcriptional elongation, RNA processing, quality control, and transcription-coupled repair; localizes to kinetochores and heterochromatin, influencing chromosomal dynamics and silencing; required for transcr…
BRE5	0.954038	0.690786	0.723416	6/6	-0.263252	0.0040612	Yes	Ubiquitin protease cofactor; forms deubiquitination complex with Ubp3p that coregulates anterograde and retrograde transport between the endoplasmic reticulum and Golgi compartments; null is sensitive to brefeldin A
MCX1	1.11669	0.862756	0.773464	6/6	-0.253931	0.0019913	Yes	Non-proteolytic ATPase of the AAA family; stimulates incorporation of the pyridoxal phosphate cofactor into Hem1p (5-aminolevulinic acid synthase); localized to the mitochondrial matrix; ortholog of vertebrate CLPX, which promotes erythropoiesis
DIA2	0.669369	0.418548	0.629176	6/6	-0.250821	0.0044246	Yes	Origin-binding F-box protein; forms SCF ubiquitin ligase complex with Skp1p and Cdc53p; functions in ubiquitination of silent chromatin structural protein Sir4p; required to target Cdc6p for destruction during G1 phase; required for deactivation of Rad53 checkpoint kinase, completion of DNA replication during recovery from DNA damage, assembly of RSC complex, RSC-mediated transcription regulation…
SWI4	1.14451	0.897642	0.78963	5/6	-0.246867	0.00869036	Yes	DNA binding component of the SBF complex (Swi4p-Swi6p); a transcriptional activator that in concert with MBF (Mbp1-Swi6p) regulates late G1-specific transcription of targets including cyclins and genes required for DNA synthesis and repair; Slt2p-independent regulator of cold growth; acetylation at two sites, K1016 and K1066, regulates interaction with Swi6p
SIN3	0.660429	0.414406	0.641632	5/6	-0.246023	0.0143605	Yes	Component of both the Rpd3S and Rpd3L histone deacetylase complexes; involved in transcriptional repression and activation of diverse processes, including mating-type switching and meiosis; involved in the maintenance of chromosomal integrity
RIM21	0.873065	0.628993	0.723157	6/6	-0.244072	0.000879258	Yes	pH sensor molecule, component of the RIM101 pathway; has a role in cell wall construction and alkaline pH response; is glycosylated and phosphorylated; interacts with Dfg16p and Rim9p to form a pH-sensing complex; localization to the plasma membrane is dependent on Dfg16p and Rim9p; has similarity to A. nidulans PalH
RRG1	0.43647	0.193396	0.452055	6/6	-0.243074	0.00909225	Yes	Protein of unknown function; required for vacuolar acidification and mitochondrial genome maintenance; the authentic, non-tagged protein is detected in highly purified mitochondria in high-throughput studies
FSH2	0.831224	0.593736	0.713652	6/6	-0.237488	0.000122821	Yes	Putative serine hydrolase that localizes to the cytoplasm; sequence is similar to S. cerevisiae Fsh1p and Fsh3p and the human candidate tumor suppressor OVCA2
END3	1.09499	0.858523	0.783898	6/6	-0.236469	0.000123531	Yes	EH domain-containing protein involved in endocytosis; actin cytoskeletal organization and cell wall morphogenesis; forms a complex with Sla1p and Pan1p
AIF1	1.27242	1.03798	0.817244	6/6	-0.234448	0.000342136	Yes	Mitochondrial cell death effector; translocates to the nucleus in response to apoptotic stimuli, homolog of mammalian Apoptosis-Inducing Factor, putative reductase
HTD2	0.874602	0.644296	0.74061	5/6	-0.230306	0.0105448	Yes	Mitochondrial 3-hydroxyacyl-thioester dehydratase; involved in fatty acid biosynthesis, required for respiratory growth and for normal mitochondrial morphology
MLP1	1.15591	0.927873	0.803057	6/6	-0.228036	2.52275e-05	Yes	Myosin-like protein associated with the nuclear envelope; nuclear basket protein that connects the nuclear pore complex with the nuclear interior; involved with Tel1p in telomere length control; involved with Pml1p and Pml39p in nuclear retention of unspliced mRNAs; MLP1 has a paralog, MLP2, that arose from the whole genome duplication
ADE12	0.524445	0.296662	0.522933	6/6	-0.227783	0.00565564	Yes	Adenylosuccinate synthase; catalyzes the first step in synthesis of adenosine monophosphate from inosine 5'monophosphate during purine nucleotide biosynthesis; exhibits binding to single-stranded autonomously replicating (ARS) core sequence
RIM20	0.86281	0.635745	0.741632	6/6	-0.227066	0.00218496	Yes	Protein involved in proteolytic activation of Rim101p; part of response to alkaline pH; PalA/AIP1/Alix family member; interaction with the ESCRT-III subunit Snf7p suggests a relationship between pH response and multivesicular body formation
SWA2	0.840961	0.614635	0.732933	5/6	-0.226326	0.00562082	Yes	Auxilin-like protein involved in vesicular transport; clathrin-binding protein required for uncoating of clathrin-coated vesicles
DOC1	0.828731	0.60507	0.737998	5/6	-0.22366	0.0186906	Yes	Processivity factor; required for the ubiquitination activity of the anaphase promoting complex (APC), mediates the activity of the APC by contributing to substrate recognition; involved in cyclin proteolysis; contains a conserved DOC1 homology domain
NUP42	1.02669	0.809096	0.801535	5/6	-0.217596	0.0442076	Yes	FG-nucleoporin component of central core of the nuclear pore complex; also part of the nuclear pore complex (NPC) cytoplasmic filaments; contributes directly to nucleocytoplasmic transport and maintenance of the NPC permeability barrier and is involved in gene tethering at the nuclear periphery; interacts with Gle1p
VPS36	0.305143	0.0915698	0.3195	6/6	-0.213573	0.00214405	Yes	Component of the ESCRT-II complex; contains the GLUE (GRAM Like Ubiquitin binding in EAP45) domain which is involved in interactions with ESCRT-I and ubiquitin-dependent sorting of proteins into the endosome; plays a role in the formation of mutant huntingtin (Htt) aggregates in yeast
TYR1	1.41453	1.20161	0.854738	5/6	-0.212923	0.00744591	Yes	Prephenate dehydrogenase involved in tyrosine biosynthesis; expression is dependent on phenylalanine levels
NPL3	0.322266	0.113102	0.341516	5/5	-0.209164	0.000292849	Yes	RNA-binding protein; promotes elongation, regulates termination, and carries poly(A) mRNA from nucleus to cytoplasm; represses translation initiation by binding eIF4G; required for pre-mRNA splicing; interacts with E3 ubiquitin ligase Bre1p, linking histone ubiquitination to mRNA processing; may have role in telomere maintenance; dissociation from mRNAs promoted by Mtr10p; phosphorylated by Sky1p…
RIM101	0.876428	0.670046	0.768418	5/6	-0.206381	0.00616625	Yes	Cys2His2 zinc-finger transcriptional repressor; involved in alkaline responsive gene repression as part of adaptation to alkaline conditions; involved in cell wall assembly; required for alkaline pH-stimulated haploid invasive growth and sporulation; activated by alkaline-dependent proteolytic processing which results in removal of the C-terminal tail; similar to A. nidulans PacC
RIM13	0.881471	0.678478	0.77032	6/6	-0.202993	3.07247e-05	Yes	Calpain-like cysteine protease; involved in proteolytic activation of Rim101p in response to alkaline pH; localizes to punctate structures in alkaline conditions and in vps4 mutant; has similarity to A. nidulans palB
TCB1	1.02709	0.826272	0.805834	6/6	-0.200818	0.000739946	Yes	Lipid-binding ER protein involved in ER-plasma membrane tethering; one of 6 proteins (Ist2p, Scs2p, Scs22p, Tcb1p, Tcb2p, Tcb3p) that connect ER to plasma membrane and regulate PI4P levels by controlling access of Sac1p phosphatase to its substrate PI4P in PM; contains 3 calcium and lipid binding domains; non-tagged protein also localizes to mitochondria; C-termini of Tcb1p, Tcb2p and Tcb3p inter…
SNF7	0.256809	0.0571498	0.223049	5/5	-0.19966	0.000222611	Yes	One of four subunits of the ESCRT-III complex; involved in the sorting of transmembrane proteins into the multivesicular body (MVB) pathway; recruited from the cytoplasm to endosomal membranes; ESCRT-III stands for endosomal sorting complex required for transport III
SWC3	0.930124	0.731579	0.788616	5/6	-0.198545	0.0152218	Yes	Protein of unknown function; component of the SWR1 complex, which exchanges histone variant H2AZ (Htz1p) for chromatin-bound histone H2A; required for formation of nuclear-associated array of smooth endoplasmic reticulum known as karmellae
TUF1	0.474937	0.278642	0.607214	6/6	-0.196295	0.00750599	Yes	Mitochondrial translation elongation factor Tu (EF-Tu); involved in fundamental pathway of mtDNA homeostasis; comprises both GTPase and guanine nucleotide exchange factor activities, while these activities are found in separate proteins in S. pombe and humans; rare mutations in human mitochondrial elongation factor Tu (EFTu) associated with severe lactic acidosis, rapidly progressive fatal enceph…
ERP4	1.05936	0.863729	0.815763	5/6	-0.19563	0.0012629	Yes	Member of the p24 family involved in ER to Golgi transport; similar to Emp24p and Erv25p; ERP4 has a paralog, ERP2, that arose from the whole genome duplication
RIM8	0.868108	0.672949	0.776562	6/6	-0.19516	0.000195363	Yes	Protein involved in proteolytic activation of Rim101p; part of response to alkaline pH; interacts with ESCRT-1 subunits Stp22p and Vps28p; essential for anaerobic growth; member of the arrestin-related trafficking adaptor family
AIM22	1.01103	0.821798	0.812993	6/6	-0.189236	0.00021026	Yes	Putative lipoate-protein ligase; required along with Lip2 and Lip5 for lipoylation of Lat1p and Kgd2p; similar to E. coli LplA; null mutant displays reduced frequency of mitochondrial genome loss
SSE1	0.869987	0.682716	0.786297	5/6	-0.187272	0.0100156	Yes	ATPase component of heat shock protein Hsp90 chaperone complex; serves as nucleotide exchange factor to load ATP onto the SSA class of cytosolic Hsp70s; plays a role in prion propagation and determining prion variants; binds unfolded proteins; member of Hsp110 subclass of HSP70 proteins; deletion results in spindle elongation in S phase; SSE1 has a paralog, SSE2, that arose from the whole genome …
CMK2	1.11797	0.931973	0.835086	5/6	-0.185997	0.00544979	Yes	Calmodulin-dependent protein kinase; may play a role in stress response, many CA++/calmodulan dependent phosphorylation substrates demonstrated in vitro, amino acid sequence similar to mammalian Cam Kinase II; CMK2 has a paralog, CMK1, that arose from the whole genome duplication
NRT1	1.10528	0.919898	0.832022	5/6	-0.185384	0.00159067	Yes	High-affinity nicotinamide riboside transporter; also transports thiamine with low affinity; major transporter for 5-aminoimidazole-4-carboxamide-1-beta-D-ribofuranoside (acadesine) uptake; shares sequence similarity with Thi7p and Thi72p; proposed to be involved in 5-fluorocytosine sensitivity
YOR072W	1.08903	0.9065	0.832092	6/6	-0.182531	0.00197658	Yes	Dubious open reading frame; unlikely to encode a functional protein, based on available experimental and comparative sequence data; partially overlaps the dubious gene YOR072W-A; diploid deletion strains are methotrexate, paraquat and wortmannin sensitive
LSM6	0.927124	0.746492	0.806368	5/6	-0.180632	0.0111714	Yes	Lsm (Like Sm) protein; part of heteroheptameric complexes (Lsm2p-7p and either Lsm1p or 8p): cytoplasmic Lsm1p complex involved in mRNA decay; nuclear Lsm8p complex part of U6 snRNP and possibly involved in processing tRNA, snoRNA, and rRNA
GSH1	0.355448	0.177311	0.501572	6/6	-0.178137	0.000109147	Yes	Gamma glutamylcysteine synthetase; catalyzes the first step in glutathione (GSH) biosynthesis; expression induced by oxidants, cadmium, and mercury; protein abundance increases in response to DNA replication stress
KTR7	1.19046	1.01238	0.85216	5/6	-0.178082	0.00137379	Yes	Putative mannosyltransferase involved in protein glycosylation; member of the KRE2/MNT1 mannosyltransferase family; KTR7 has a paralog, KTR5, that arose from the whole genome duplication
RSM22	0.613035	0.440493	0.734926	5/6	-0.172542	0.0239695	Yes	Mitochondrial ribosomal protein of the small subunit; also predicted to be an S-adenosylmethionine-dependent RNA methyltransferase
OCA2	1.1671	0.997519	0.85702	5/6	-0.169579	0.00455374	Yes	Protein of unknown function; similar to predicted tyrosine phosphatases Oca1p and Siw14p; green fluorescent protein (GFP)-fusion protein localizes to the cytoplasm; YNL056W is not an essential gene
PHB2	1.05844	0.889026	0.84429	5/6	-0.169412	0.0100194	Yes	Subunit of the prohibitin complex (Phb1p-Phb2p); prohibitin is a 1.2 MDa ring-shaped inner mitochondrial membrane chaperone that stabilizes newly synthesized proteins; determinant of replicative life span; involved in mitochondrial segregation; prohibitin deficiency induces a mitochondrial unfolded protein response (mtUPR)
MSW1	1.00213	0.832827	0.83222	5/6	-0.169308	0.000915711	Yes	Mitochondrial tryptophanyl-tRNA synthetase
VPS21	1.02281	0.856287	0.84012	5/6	-0.166524	0.00343495	Yes	Endosomal Rab family GTPase; required for endocytic transport and sorting of vacuolar hydrolases; required for endosomal localization of the CORVET complex; required with YPT52 for MVB biogenesis and sorting; involved in autophagy and ionic stress tolerance; geranylgeranylation required for membrane association; protein abundance increases in response to DNA replication stress; mammalian Rab5 hom…
CIK1	0.972739	0.806495	0.831474	5/6	-0.166243	0.00853236	Yes	Kinesin-associated protein; required for both karyogamy and mitotic spindle organization, interacts stably and specifically with Kar3p and may function to target this kinesin to a specific cellular role; locus encodes a long and short transcript with differing functions; CIK1 has a paralog, VIK1, that arose from the whole genome duplication
SNF8	0.273431	0.107386	0.4091	5/5	-0.166046	0.00613903	Yes	Component of the ESCRT-II complex; ESCRT-II is involved in ubiquitin-dependent sorting of proteins into the endosome; appears to be functionally related to SNF7; involved in glucose derepression
LSM7	1.10939	0.94841	0.856543	5/6	-0.160981	0.0105456	Yes	Lsm (Like Sm) protein; part of heteroheptameric complexes (Lsm2p-7p and either Lsm1p or 8p): cytoplasmic Lsm1p complex involved in mRNA decay; nuclear Lsm8p complex part of U6 snRNP and possibly involved in processing tRNA, snoRNA, and rRNA; protein abundance increases and forms cytoplasmic foci in response to DNA replication stress
AIM10	0.300144	0.140956	0.481967	6/6	-0.159188	0.00105996	Yes	Protein with similarity to tRNA synthetases; non-tagged protein is detected in purified mitochondria; null mutant is viable and displays elevated frequency of mitochondrial genome loss
GLN3	0.556168	0.397282	0.715634	6/6	-0.158886	0.0018855	Yes	Transcriptional activator of genes regulated by nitrogen catabolite repression; localization and activity regulated by quality of nitrogen source and Ure2p
GLC8	0.977459	0.819434	0.83973	6/6	-0.158026	0.000517254	Yes	Regulatory subunit of protein phosphatase 1 (Glc7p); involved in glycogen metabolism and chromosome segregation; proposed to regulate Glc7p activity via conformational alteration; ortholog of the mammalian protein phosphatase inhibitor 2; protein abundance increases in response to DNA replication stress
SPE2	0.283007	0.125115	0.454188	5/5	-0.157892	0.00440781	Yes	S-adenosylmethionine decarboxylase; required for the biosynthesis of spermidine and spermine; cells lacking Spe2p require spermine or spermidine for growth in the presence of oxygen but not when grown anaerobically
ATG17	1.00978	0.852626	0.845655	5/6	-0.157158	0.00469031	Yes	Scaffold protein responsible for phagophore assembly site organization; regulatory subunit of an autophagy-specific complex that includes Atg1p and Atg13p; stimulates Atg1p kinase activity; human ortholog RB1CC1/FIP200 interacts with p53, which inhibits autophagy in human cells
ESC1	1.04392	0.887286	0.850883	5/6	-0.15663	0.00372671	Yes	Protein involved in telomeric silencing; required for quiescent cell telomere hypercluster localization at nuclear membrane vicinity; interacts with PAD4-domain of Sir4p
UBP6	1.13282	0.976222	0.863891	5/6	-0.156603	0.00857785	Yes	Ubiquitin-specific protease; situated in the base subcomplex of the 26S proteasome, releases free ubiquitin from branched polyubiquitin chains en bloc, rather than from the distal tip of the chain; negatively regulates degradation of ubiquitinated proteins by the proteasome; works in opposition to Hul5p polyubiquitin elongation activity; mutant has aneuploidy tolerance; human homolog UBP14 comple…
ATX2	0.99515	0.838614	0.84214	5/6	-0.156537	0.0101524	Yes	Golgi membrane protein involved in manganese homeostasis; overproduction suppresses the sod1 (copper, zinc superoxide dismutase) null mutation
IAI11	1.09624	0.940043	0.857495	5/6	-0.156199	0.000498701	Yes	Putative protein of unknown function; the authentic, non-tagged protein is detected in highly purified mitochondria in high-throughput studies; YBL059W has a paralog, YER093C-A, that arose from the whole genome duplication
RIM9	0.814737	0.658573	0.809103	5/6	-0.156164	0.00218933	Yes	Plasma membrane protein of unknown function; involved in the proteolytic activation of Rim101p in response to alkaline pH; interacts with Rim21p and Dfg16p to form a pH-sensing complex in the Rim101 pathway and is required to maintain Rim21p levels; has similarity to A. nidulans PalI;
PRM4	1.06178	0.90586	0.854537	5/6	-0.155918	0.0144284	Yes	Pheromone-regulated protein proposed to be involved in mating; predicted to have 1 transmembrane segment; transcriptionally regulated by Ste12p during mating and by Cat8p during the diauxic shift
POG1	1.29586	1.14125	0.88187	5/6	-0.154611	0.00878766	Yes	Nuclear chromatin-associated protein of unknown function; may have a role in cell cycle regulation; overexpression promotes recovery from pheromone induced arrest and suppresses the stress sensitivity caused by a mutation in the E3 ubiquitin ligase Rsp5p; binds upstream of BAR1 and cell cycle-related genes; phsosphoylated form may be ubiquitinated by Dma2p; potential Cdc28p substrate; SBF regulat…
BUD21	0.586628	0.432319	0.737594	5/6	-0.154309	0.0383592	Yes	Component of small ribosomal subunit (SSU) processosome; this complex contains U3 snoRNA; required at post-transcriptional step for efficient retrotransposition; absence results in decreased Ty1 Gag:GFP protein levels; originally isolated as bud-site selection mutant that displays a random budding pattern
NGL1	1.01132	0.857082	0.848763	5/6	-0.154242	0.00272297	Yes	Putative endonuclease; has a domain similar to a magnesium-dependent endonuclease motif in mRNA deadenylase Ccr4p; the authentic, non-tagged protein is detected in highly purified mitochondria in high-throughput studies
DNM1	1.02571	0.871961	0.85359	5/6	-0.153753	0.0050305	Yes	Dynamin-related GTPase involved in mitochondrial organization; required for mitochondrial fission and inheritance; self assembles on the cytoplasmic face of mitochondrial tubules at sites where division will occur; participates in endocytosis and regulates peroxisome fission along with Vps1p; mutants in the human ortholog DNM1L, which mediates mitochondrial fission, peroxisomal division, autophag…
SEC28	0.347368	0.19371	0.578548	6/6	-0.153659	0.00506726	Yes	Epsilon-COP subunit of the coatomer; regulates retrograde Golgi-to-ER protein traffic; stabilizes Cop1p, the alpha-COP and the coatomer complex; non-essential for cell growth; protein abundance increases in response to DNA replication stress
RMD9	0.712391	0.562906	0.800608	5/6	-0.149485	0.0336154	Yes	Mitochondrial protein required for respiratory growth; mutant phenotype and genetic interactions suggest a role in delivering mt mRNAs to ribosomes; located on matrix face of the inner membrane and loosely associated with mitoribosomes; RMD9 has a paralog, YBR238C, that arose from the whole genome duplication
SSZ1	0.476731	0.328754	0.694448	5/6	-0.147977	0.0225344	Yes	Hsp70 protein that interacts with Zuo1p (a DnaJ homolog); interacts with Zuo1p to form a ribosome-associated complex that binds the ribosome via the Zuo1p subunit; also involved in pleiotropic drug resistance via sequential activation of PDR1 and PDR5; binds ATP
SLZ1	1.18464	1.03672	0.876067	5/6	-0.147923	0.000751577	Yes	Sporulation-specific protein with a leucine zipper motif; subunit of the MIS complex which controls mRNA methylation during during the induction of sporulation
HAC1	1.02118	0.874186	0.857173	5/6	-0.146996	0.00535659	Yes	Basic leucine zipper (bZIP) transcription factor (ATF/CREB1 homolog); regulates the unfolded protein response, via UPRE binding, and membrane biogenesis; ER stress-induced splicing pathway facilitates efficient Hac1p synthesis; two functional forms of Hac1p are produced; translation initiation is repressed under non-stress conditions; protein abundance increases in response to DNA replication str…
RUD3	0.908695	0.762669	0.839729	5/6	-0.146026	0.000449294	Yes	Golgi matrix protein; involved in the structural organization of the cis-Golgi; interacts genetically with COG3 and USO1
POM33	1.01465	0.870555	0.860444	5/6	-0.144094	0.00146887	Yes	Transmembrane nucleoporin; involved in nuclear pore complex (NPC) distribution, assembly or stabilization; highly conserved across species, orthologous to human TMEM33 and paralogous to Per33p; protein abundance increases in response to DNA replication stress
HOM6	0.846082	0.702012	0.832144	5/6	-0.144071	0.00543448	Yes	Homoserine dehydrogenase (L-homoserine:NADP oxidoreductase); dimeric enzyme that catalyzes the third step in the common pathway for methionine and threonine biosynthesis; enzyme has nucleotide-binding, dimerization and catalytic regions
TDA3	1.14074	0.999885	0.877159	5/6	-0.140857	0.000689232	Yes	Putative oxidoreductase involved in late endosome to Golgi transport; physical and genetical interactions with Btn2p; null mutant is viable, has extended S phase, and sensitive to expression of top1-T722A allele; similar to human FOXRED1
PEX15	0.935064	0.795364	0.851725	5/6	-0.1397	0.00438953	Yes	Tail-anchored type II integral peroxisomal membrane protein; required for peroxisome biogenesis; cells lacking Pex15p mislocalize peroxisomal matrix proteins to cytosol; overexpression results in impaired peroxisome assembly
HIS3	1.00292	0.865147	0.863889	5/6	-0.137771	0.00234338	Yes	Imidazoleglycerol-phosphate dehydratase; catalyzes the sixth step in histidine biosynthesis; mutations cause histidine auxotrophy and sensitivity to Cu, Co, and Ni salts; transcription is regulated by general amino acid control via Gcn4p
RPL31A	0.580142	0.44292	0.766188	6/6	-0.137221	0.00463581	Yes	Ribosomal 60S subunit protein L31A; associates with karyopherin Sxm1p; loss of both Rpl31p and Rpl39p confers lethality; homologous to mammalian ribosomal protein L31, no bacterial homolog; RPL31A has a paralog, RPL31B, that arose from the whole genome duplication
AIM20	1.21167	1.07503	0.889451	5/6	-0.136646	0.00671856	Yes	Protein of unknown function; overexpression causes cell cycle delay or arrest; green fluorescent protein (GFP)-fusion protein localizes to vacuole; null mutant displays elevated frequency of mitochondrial genome loss; relocalizes from nucleus to cytoplasm upon DNA replication stress; AIM20 has a paralog, SKG1, that arose from the whole genome duplication
BEM3	1.11416	0.979296	0.880561	5/6	-0.134861	0.00395308	Yes	Rho GTPase activating protein (RhoGAP); involved in control of the cytoskeleton organization; targets the essential Rho-GTPase Cdc42p, which controls establishment and maintenance of cell polarity, including bud-site assembly
TIF4631	0.903278	0.772306	0.855699	5/6	-0.130972	0.000888445	Yes	Translation initiation factor eIF4G; subunit of the mRNA cap-binding protein complex (eIF4F) that also contains eIF4E (Cdc33p); interacts with Pab1p and with eIF4A (Tif1p); also has a role in biogenesis of the large ribosomal subunit; TIF4631 has a paralog, TIF4632, that arose from the whole genome duplication
HOM2	1.02174	0.892228	0.873567	5/6	-0.129515	0.000391449	Yes	Aspartic beta semi-aldehyde dehydrogenase; catalyzes the second step in the common pathway for methionine and threonine biosynthesis; expression regulated by Gcn4p and the general control of amino acid synthesis
MRPL38	0.664512	0.53709	0.809579	6/6	-0.127422	0.00197582	Yes	Mitochondrial ribosomal protein of the large subunit; appears as two protein spots (YmL34 and YmL38) on two-dimensional SDS gels; protein abundance increases in response to DNA replication stress
YGR122W	0.803022	0.67697	0.845488	5/6	-0.126052	0.0121566	Yes	Protein that may be involved in pH regulation; probable ortholog of A. nidulans PalC, which is involved in pH regulation and binds to the ESCRT-III complex; null mutant does not properly process Rim101p and has decreased resistance to rapamycin; GFP-fusion protein is cytoplasmic; relative distribution to cytoplasm increases upon DNA replication stress
AVT1	1.06824	0.942528	0.883017	5/6	-0.125708	0.00139839	Yes	Vacuolar transporter; imports large neutral amino acids into the vacuole; member of a family of seven S. cerevisiae genes (AVT1-7) related to vesicular GABA-glycine transporters
MRPL23	0.779092	0.654586	0.841709	5/6	-0.124506	0.00276586	Yes	Mitochondrial ribosomal protein of the large subunit; localizes to vacuole in response to H2O2
PET123	0.943239	0.818954	0.870576	5/6	-0.124285	0.00779096	Yes	Mitochondrial ribosomal protein of the small subunit; PET123 exhibits genetic interactions with PET122, which encodes a COX3 mRNA-specific translational activator
SWC7	1.05697	0.935032	0.886427	5/6	-0.121941	0.0060754	Yes	Protein of unknown function; component of the Swr1p complex that incorporates Htz1p into chromatin
RNR4	0.288723	0.167	0.583597	6/6	-0.121723	0.00107924	Yes	Ribonucleotide-diphosphate reductase (RNR) small subunit; the RNR complex catalyzes the rate-limiting step in dNTP synthesis and is regulated by DNA replication and DNA damage checkpoint pathways via localization of the small subunits; relocalizes from nucleus to cytoplasm upon DNA replication stress; RNR4 has a paralog, RNR2, that arose from the whole genome duplication
HAT1	1.09952	0.977884	0.890149	5/6	-0.121636	0.00117078	Yes	Catalytic subunit of the Hat1p-Hat2p histone acetyltransferase complex; uses the cofactor acetyl coenzyme A to acetylate free nuclear and cytoplasmic histone H4; involved in telomeric silencing and DNA double-strand break repair
INO4	0.534268	0.415048	0.784339	6/6	-0.11922	0.00505509	Yes	Transcription factor involved in phospholipid synthesis; required for derepression of inositol-choline-regulated genes involved in phospholipid synthesis; forms a complex, with Ino2p, that binds the inositol-choline-responsive element through a basic helix-loop-helix domain
ATP12	0.574531	0.455349	0.800527	5/6	-0.119182	0.0168816	Yes	Assembly factor for F1 sector of mitochondrial F1F0 ATP synthase; conserved protein; required for assembly of alpha and beta subunits into F1 sector of mitochondrial F1F0 ATP synthase; human homolog ATPAF2 can complement yeast atp12 mutant; mutation of human homolog reduces active ATP synthase levels and is associated with the disorder ATPAF2 deficiency
MMS22	0.606019	0.487221	0.805155	5/6	-0.118797	0.0017611	Yes	Subunit of E3 ubiquitin ligase complex involved in replication repair; stabilizes protein components of the replication fork, such as the fork-pausing complex and leading strand polymerase, preventing fork collapse and promoting efficient recovery during replication stress; required for accurate meiotic chromosome segregation
MRPS5	0.735105	0.619007	0.843188	5/6	-0.116098	0.000943476	Yes	Mitochondrial ribosomal protein of the small subunit
MDJ1	0.473568	0.357838	0.751037	6/6	-0.11573	0.00382525	Yes	Co-chaperone that stimulates HSP70 protein Ssc1p ATPase activity; involved in protein folding/refolding in the mitochodrial matrix; required for proteolysis of misfolded proteins; member of the HSP40 (DnaJ) family of chaperones
MGM101	0.657111	0.543447	0.830174	5/6	-0.113663	0.00505373	Yes	Protein with a role in mitochondrial DNA recombinational repair; also involved in interstrand cross-link repair; binds to and catalyzes the annealing of single-stranded mtDNA; oligomerizes to form rings and filaments; related to Rad52-type recombination proteins, with limited overall similarity but sharing conserved functionally important residues; component of the mitochondrial nucleoid, require…
MRS1	0.92104	0.807432	0.877272	5/6	-0.113608	0.00463279	Yes	Splicing protein; required for splicing of two mitochondrial group I introns (BI3 in COB and AI5beta in COX1); forms a splicing complex, containing four subunits of Mrs1p and two subunits of the BI3-encoded maturase, that binds to the BI3 RNA; MRS1 has a paralog, CCE1, that arose from the whole genome duplication
SEA4	1.00575	0.898614	0.893728	5/6	-0.107136	0.000211781	Yes	Subunit of SEACAT, a subcomplex of the SEA complex; Sea4p, along with Rtc1p and Mtc5p, redundantly inhibit the TORC1 inhibitory role of the Iml1p/SEACIT (Iml1p-Npr2p-Npr3p) subcomplex, a GAP for GTPase Gtr1p (EGOC subunit) in response to amino acid limitation, thereby resulting in activation of TORC1 signaling; SEA is a coatomer-related complex that associates dynamically with the vacuole; contai…
YGR219W	0.70084	0.594011	0.848953	5/6	-0.106829	0.000457916	Yes	Dubious open reading frame; unlikely to encode a functional protein, based on available experimental and comparative sequence data; partially overlaps the verified ORF MRPL9/YGR220C
ATP11	0.760688	0.654453	0.861231	5/6	-0.106235	0.00219162	Yes	Molecular chaperone; required for the assembly of alpha and beta subunits into the F1 sector of mitochondrial F1F0 ATP synthase; N-terminally propionylated in vivo
FYV7	0.571694	0.467022	0.821948	5/6	-0.104672	0.011306	Yes	Essential protein required for maturation of 18S rRNA; required for survival upon exposure to K1 killer toxin
RNR1	0.746642	0.646125	0.865502	6/6	-0.100518	2.25708e-05	Yes	Major isoform of large subunit of ribonucleotide-diphosphate reductase; the RNR complex catalyzes rate-limiting step in dNTP synthesis, regulated by DNA replication and DNA damage checkpoint pathways via localization of small subunits; relative distribution to the nucleus increases upon DNA replication stress; RNR1 has a paralog, RNR3, that arose from the whole genome duplication
MSN5	0.913381	0.815059	0.894548	5/6	-0.0983215	0.0140226	Yes	Karyopherin; involved in nuclear import and export of proteins, including import of replication protein A and export of Far1p and transcription factors Swi5p, Swi6p, Msn2p, and Pho4p; required for re-export of mature tRNAs after their retrograde import from the cytoplasm; exportin-5 homolog
LYS14	0.284621	0.189098	0.688428	5/5	-0.0955232	0.0272469	Yes	Transcriptional activator involved in regulating lysine biosynthesis; involved in the regulation of genes of the lysine biosynthesis pathway; requires 2-aminoadipate semialdehyde as co-inducer
MNN10	0.535335	0.440848	0.826503	5/6	-0.094487	0.0050592	Yes	Subunit of a Golgi mannosyltransferase complex; complex mediates elongation of the polysaccharide mannan backbone; membrane protein of the mannosyltransferase family; other members of the complex are Anp1p, Mnn9p, Mnn11p, and Hoc1p
CUE3	0.729143	0.635543	0.876797	5/6	-0.0935994	0.0441301	Yes	Protein of unknown function; has a CUE domain that binds ubiquitin, which may facilitate intramolecular monoubiquitination
REG1	0.381336	0.288677	0.76579	5/6	-0.0926586	0.0119443	Yes	Regulatory subunit of type 1 protein phosphatase Glc7p; involved in negative regulation of glucose-repressible genes; involved in regulation of the nucleocytoplasmic shuttling of Hxk2p; REG1 has a paralog, REG2, that arose from the whole genome duplication
PDX3	0.389205	0.323546	0.830523	5/6	-0.0656581	0.00190968	Yes	Pyridoxine (pyridoxamine) phosphate oxidase; has homologs in E. coli and Myxococcus xanthus; transcription is under the general control of nitrogen metabolism

## Sheet: Table 3
Table 3. DBP5 mutagenesis oligo sequences
Forward	Sequence	Reverse	Sequence3
GFP-Dbp5_FWD_2	cggcgccatgGCTgatacaaagagagatc	GFP-Dbp5_REV_2	AGCcatggcgccggatcctcctc
GFP-Dbp5_FWD_3	gcgccatgagtGCTacaaagagagatcc	GFP-Dbp5_REV_3	GCactcatggcgccggatcctc
GFP-Dbp5_FWD_4	GCAaagagagatccggccgatttactagc	GFP-Dbp5_REV_4	ggatctctcttTGCatcactcattccgatc
GFP-Dbp5_FWD_5	caGCTagagatccggccgatttactagcttc	GFP-Dbp5_REV_5	ggatctctAGCtgtatcactcatggcgccggatc
GFP-Dbp5_FWD_6	agtgatacaaagGCAgatccggccgatttac	GFP-Dbp5_REV_6	Cctttgtatcactcattccgatctaaggtgg
GFP-Dbp5_FWD_7	gagaGCTccggccgatttactagcttc	GFP-Dbp5_REV_7	cggccggAGCtctctttgtatcactc
GFP-Dbp5_FWD_8	caaagagagatGCTgccgatttactagcttc	GFP-Dbp5_REV_8	cAGCatctctctttgtatcactcattccgatc
GFP-Dbp5_FWD_9	tacaaagagagatccgGGTgatttactagcttc	GFP-Dbp5_REV_9	atctctctttgtatcactcatggcgccggatc
GFP-Dbp5_FWD_10	gatccggccGCTttactagcttctttaaag	GFP-Dbp5_REV_10	aAGCggccggatctctctttgtatcactc
GFP-Dbp5_FWD_11	agatccggccgatGCActagcttctttaaag	GFP-Dbp5_REV_11	atcggccggatctctctttgtatcactc
GFP-Dbp5_FWD_12	gatccggccgatttaGCAgcttctttaaagattg	GFP-Dbp5_REV_12	aatcggccggatctctctttgtatcactc
GFP-Dbp5_FWD_13	ccggccgatttactaGGTtctttaaagattgataatg	GFP-Dbp5_REV_13	agtaaatcggccggatctctctttgtatc
GFP-Dbp5_FWD_14	cggccgatttactagctGCTttaaagattgataatg	GFP-Dbp5_REV_14	agtaaatcggccggatctctctttgtatc
GFP-Dbp5_FWD_15	ggccgatttactagcttctGCAaagattgataatgag	GFP-Dbp5_REV_15	gctagtaaatcggccggatctctctttg
GFP-Dbp5_FWD_16	gccgatttactagcttctttaGCTattgataatgagaaag	GFP-Dbp5_REV_16	gctagtaaatcggccggatctctctttg
GFP-Dbp5_FWD_17	actagcttctttaaagGCTgataatgagaaagaggatac	GFP-Dbp5_REV_17	taaagaagctagtaaatcggccggatctc
GFP-Dbp5_FWD_18	ctagcttctttaaagattGCTaatgagaaagaggatac	GFP-Dbp5_REV_18	ttaaagaagctagtaaatcggccggatctc
GFP-Dbp5_FWD_19	actagcttctttaaagattgatGCTgagaaagaggatac	GFP-Dbp5_REV_19	taaagaagctagtaaatcggccggatctc
GFP-Dbp5_FWD_20	GCTaaagaggatacaagtgaagtttcaacaaaagagac	GFP-Dbp5_REV_20	tatcctctttAGCattatcaatctttaaagaagctagtaaatcg
GFP-Dbp5_FWD_21	gagGCAgaggatacaagtgaagtttcaacaaaagag	GFP-Dbp5_REV_21	tgtatcctcTGCctcattatcaatctttaaagaagctag
GFP-Dbp5_FWD_22	gagaaaGCTgatacaagtgaagtttcaacaaaagagac	GFP-Dbp5_REV_22	tatcAGCtttctcattatcaatctttaaagaagctagtaaatcg
GFP-Dbp5_FWD_23	gagGCTacaagtgaagtttcaacaaaagagactg	GFP-Dbp5_REV_23	cacttgtAGCctctttctcattatcaatctttaaagaag
GFP-Dbp5_FWD_24	gaggatGCAagtgaagtttcaacaaaagagactg	GFP-Dbp5_REV_24	cactTGCatcctctttctcattatcaatctttaaagaag
GFP-Dbp5_FWD_25	GCTgaagtttcaacaaaagagactgttaagtcccaac	GFP-Dbp5_REV_25	gttgaaacttcAGCtgtatcctctttctcattatcaatc
GFP-Dbp5_FWD_26	gaggatacaagtGCAgtttcaacaaaagagactg	GFP-Dbp5_REV_26	Cacttgtatcctctttctcattatcaatctttaaagaag
GFP-Dbp5_FWD_27	GCTtcaacaaaagagactgttaagtcccaacc	GFP-Dbp5_REV_27	ctcttttgttgaAGCttcacttgtatcctctttctc
GFP-Dbp5_FWD_28	GCAacaaaagagactgttaagtcccaaccag	GFP-Dbp5_REV_28	gtctcttttgtTGCaacttcacttgtatcctctttc
GFP-Dbp5_FWD_29	caGCAaaagagactgttaagtcccaaccag	GFP-Dbp5_REV_29	cagtctctttTGCtgaaacttcacttgtatcctc
GFP-Dbp5_FWD_30	tcaacaGCAgagactgttaagtcccaaccag	GFP-Dbp5_REV_30	gtctcTGCtgttgaaacttcacttgtatcctctttc
GFP-Dbp5_FWD_31	GCTactgttaagtcccaaccagaaaagactg	GFP-Dbp5_REV_31	gacttaacagtAGCttttgttgaaacttcacttgtatcc
GFP-Dbp5_FWD_32	caacaaaagagGCTgttaagtcccaaccag	GFP-Dbp5_REV_32	cAGCctcttttgttgaaacttcacttgtatcctc
GFP-Dbp5_FWD_33	agagactGCTaagtcccaaccagaaaagac	GFP-Dbp5_REV_33	cttAGCagtctcttttgttgaaacttcacttgtatcc
GFP-Dbp5_FWD_34	agagactgttGCTtcccaaccagaaaagactg	GFP-Dbp5_REV_34	AGCaacagtctcttttgttgaaacttcacttgtatcctc
GFP-Dbp5_FWD_35	gagactgttaagGCTcaaccagaaaagactg	GFP-Dbp5_REV_35	GCcttaacagtctcttttgttgaaacttcacttgtatcc
GFP-Dbp5_FWD_36	agactgttaagtccGCAccagaaaagactgc	GFP-Dbp5_REV_36	ggacttaacagtctcttttgttgaaacttcacttg
GFP-Dbp5_FWD_37	aagtcccaaGCAgaaaagactgctgattcg	GFP-Dbp5_REV_37	cTGCttgggacttaacagtctcttttgttgaaac
GFP-Dbp5_FWD_38	gtcccaaccaGCAaagactgctgattcg	GFP-Dbp5_REV_38	TGCtggttgggacttaacagtctcttttgttg
GFP-Dbp5_FWD_39	gtcccaaccagaaGCTactgctgattcgatc	GFP-Dbp5_REV_39	ttctggttgggacttaacagtctcttttgttg
GFP-Dbp5_FWD_40	gGCTgctgattcgatcaagcctgcag	GFP-Dbp5_REV_40	cgaatcagcAGCcttttctggttgggac
GFP-Dbp5_FWD_41	cagaaaagactGGTgattcgatcaagcctg	GFP-Dbp5_REV_41	CCagtcttttctggttgggacttaacagtc
GFP-Dbp5_FWD_42	gactgctGCTtcgatcaagcctgcag	GFP-Dbp5_REV_42	cgaAGCagcagtcttttctggttgggac
GFP-Dbp5_FWD_43	ctgctgatGCTatcaagcctgcagaaaaattag	GFP-Dbp5_REV_43	gatAGCatcagcagtcttttctggttgggac
GFP-Dbp5_FWD_44	ctgctgattcgGCTaagcctgcagaaaaattag	GFP-Dbp5_REV_44	GCcgaatcagcagtcttttctggttgggac
GFP-Dbp5_FWD_45	ctgctgattcgatcGCTcctgcagaaaaattag	GFP-Dbp5_REV_45	atcgaatcagcagtcttttctggttgggac
GFP-Dbp5_FWD_46	gctgattcgatcaagGCTgcagaaaaattagttc	GFP-Dbp5_REV_46	tgatcgaatcagcagtcttttctggttgg
GFP-Dbp5_FWD_47	ctgattcgatcaagcctGGAgaaaaattagttcc	GFP-Dbp5_REV_47	ttgatcgaatcagcagtcttttctggttgg
GFP-Dbp5_FWD_48	gcctgcaGCAaaattagttccaaaagttgagg	GFP-Dbp5_REV_48	atttTGCtgcaggcttgatcgaatcagcag
GFP-Dbp5_FWD_49	gcctgcagaaGCAttagttccaaaagttgagg	GFP-Dbp5_REV_49	TGCttctgcaggcttgatcgaatcagcagtc
GFP-Dbp5_FWD_50	gcctgcagaaaaaGCAgttccaaaagttgagg	GFP-Dbp5_REV_50	tttttctgcaggcttgatcgaatcagcag
GFP-Dbp5_FWD_51	GCTccaaaagttgaggaaaaaaaaacaaaacaggagg	GFP-Dbp5_REV_51	ctcaacttttggAGCtaatttttctgcaggcttg
GFP-Dbp5_FWD_52	agttGCAaaagttgaggaaaaaaaaacaaaacaggagg	GFP-Dbp5_REV_52	caactttTGCaactaatttttctgcaggcttgatcg
GFP-Dbp5_FWD_53	gttccaGCAgttgaggaaaaaaaaacaaaacaggagg	GFP-Dbp5_REV_53	ctcaacTGCtggaactaatttttctgcaggcttg
GFP-Dbp5_FWD_54	gttccaaaaGCTgaggaaaaaaaaacaaaacaggagg	GFP-Dbp5_REV_54	ctcAGCttttggaactaatttttctgcaggcttg
GFP-Dbp5_FWD_55	tagttccaaaagttGCTgaaaaaaaaacaaaacaggagg	GFP-Dbp5_REV_55	Caacttttggaactaatttttctgcaggcttgatc
GFP-Dbp5_FWD_56	gttccaaaagttgagGCAaaaaaaacaaaacaggagg	GFP-Dbp5_REV_56	ctcaacttttggaactaatttttctgcaggcttg
GFP-Dbp5_FWD_57	gttccaaaagttgaggaaGCAaaaacaaaacaggagg	GFP-Dbp5_REV_57	ctcaacttttggaactaatttttctgcaggcttg
GFP-Dbp5_FWD_58	ccaaaagttgaggaaaaaGCAacaaaacaggaggatag	GFP-Dbp5_REV_58	cctcaacttttggaactaatttttctgcaggcttg
GFP-Dbp5_FWD_59	ccaaaagttgaggaaaaaaaaGCAaaacaggaggatag	GFP-Dbp5_REV_59	cctcaacttttggaactaatttttctgcaggcttg
GFP-Dbp5_FWD_60	aaaaaacaGCAcaggaggatagtaatttaatcagctcag	GFP-Dbp5_REV_60	cctgTGCtgtttttttttcctcaacttttggaactaatttttc
GFP-Dbp5_FWD_61	caaaaGCTgaggatagtaatttaatcagctcagaatatgaag	GFP-Dbp5_REV_61	tcctcAGCttttgtttttttttcctcaacttttggaactaatttttc
GFP-Dbp5_FWD_62	caaaacagGCTgatagtaatttaatcagctcagaatatg	GFP-Dbp5_REV_62	atcAGCctgttttgtttttttttcctcaacttttggaac
GFP-Dbp5_FWD_63	caggagGCTagtaatttaatcagctcagaatatgaag	GFP-Dbp5_REV_63	tactAGCctcctgttttgtttttttttcctcaacttttg
GFP-Dbp5_FWD_64	caaaacaggaggatGCTaatttaatcagctcagaatatg	GFP-Dbp5_REV_64	tcctcctgttttgtttttttttcctcaacttttggaac
GFP-Dbp5_FWD_65	caggaggatagtGCTttaatcagctcagaatatgaag	GFP-Dbp5_REV_65	Cactatcctcctgttttgtttttttttcctcaacttttg
GFP-Dbp5_FWD_66	caggaggatagtaatGCAatcagctcagaatatgaag	GFP-Dbp5_REV_66	tactatcctcctgttttgtttttttttcctcaacttttg
GFP-Dbp5_FWD_67	GCTagctcagaatatgaagttaaggtcaaacttgctg	GFP-Dbp5_REV_67	attctgagctAGCtaaattactatcctcctgttttgtttttttttc
GFP-Dbp5_FWD_68	ttaatcGCTtcagaatatgaagttaaggtcaaacttgctg	GFP-Dbp5_REV_68	ctgaAGCgattaaattactatcctcctgttttgtttttttttcc
GFP-Dbp5_FWD_69	cagcGCAgaatatgaagttaaggtcaaacttgc	GFP-Dbp5_REV_69	tcatattcTGCgctgattaaattactatcctcctgttttg
GFP-Dbp5_FWD_70	cagctcaGCAtatgaagttaaggtcaaacttgc	GFP-Dbp5_REV_70	ataTGCtgagctgattaaattactatcctcctgttttg
GFP-Dbp5_FWD_71	cagctcagaaGCTgaagttaaggtcaaacttgc	GFP-Dbp5_REV_71	cAGCttctgagctgattaaattactatcctcctgttttg
GFP-Dbp5_FWD_72	GCAgttaaggtcaaacttgctgatatccagg	GFP-Dbp5_REV_72	tgaccttaacTGCatattctgagctgattaaattactatc
GFP-Dbp5_FWD_73	gaaGCTaaggtcaaacttgctgatatccagg	GFP-Dbp5_REV_73	tgaccttAGCttcatattctgagctgattaaattactatc
GFP-Dbp5_FWD_74	GCTgtcaaacttgctgatatccaggctgacc	GFP-Dbp5_REV_74	caagtttgacAGCaacttcatattctgagctgattaaattac
GFP-Dbp5_FWD_75	gGCTaaacttgctgatatccaggctgacc	GFP-Dbp5_REV_75	cagcaagtttAGCcttaacttcatattctgagctg
GFP-Dbp5_FWD_76	ggtcGCActtgctgatatccaggctgac	GFP-Dbp5_REV_76	cagcaagTGCgaccttaacttcatattctgagc
GFP-Dbp5_FWD_77	ggtcaaaGCTgctgatatccaggctgacc	GFP-Dbp5_REV_77	cagcAGCtttgaccttaacttcatattctgagctg
GFP-Dbp5_FWD_78	ggtcaaacttGGTgatatccaggctgacc	GFP-Dbp5_REV_78	cACCaagtttgaccttaacttcatattctgagctg
GFP-Dbp5_FWD_79	gctGCTatccaggctgacccaaattctc	GFP-Dbp5_REV_79	agcctggatAGCagcaagtttgaccttaac
GFP-Dbp5_FWD_81	acttgctgatatcGCTgctgacccaaattctc	GFP-Dbp5_REV_81	gatatcagcaagtttgaccttaacttcatattctgag
GFP-Dbp5_FWD_82	gctgatatccagGGTgacccaaattctcc	GFP-Dbp5_REV_82	Cctggatatcagcaagtttgaccttaacttc
GFP-Dbp5_FWD_83	ccaggctGCTccaaattctccattgtacag	GFP-Dbp5_REV_83	tggAGCagcctggatatcagcaagtttgac
GFP-Dbp5_FWD_84	atccaggctgacGCAaattctccattgtac	GFP-Dbp5_REV_84	Cgtcagcctggatatcagcaagtttgacc
GFP-Dbp5_FWD_85	caggctgacccaGCTtctccattgtacag	GFP-Dbp5_REV_85	Ctgggtcagcctggatatcagcaagtttg
GFP-Dbp5_FWD_86	gctgacccaaatGCTccattgtacagtgc	GFP-Dbp5_REV_86	GCatttgggtcagcctggatatcagcaag
GFP-Dbp5_FWD_87	ctgacccaaattctGCAttgtacagtgctaaatc	GFP-Dbp5_REV_87	gaatttgggtcagcctggatatcagcaag
GFP-Dbp5_FWD_88	ctgacccaaattctccaGCTtacagtgctaaatc	GFP-Dbp5_REV_88	gagaatttgggtcagcctggatatcagc
GFP-Dbp5_FWD_89	gacccaaattctccattgGCTagtgctaaatcttttg	GFP-Dbp5_REV_89	gagaatttgggtcagcctggatatcagc
GFP-Dbp5_FWD_90	cccaaattctccattgtacGCTgctaaatcttttgatg	GFP-Dbp5_REV_90	tggagaatttgggtcagcctggatatcag
GFP-Dbp5_FWD_91	tctccattgtacagtGGTaaatcttttgatgaattagg	GFP-Dbp5_REV_91	tgtacaatggagaatttgggtcagcctgg
GFP-Dbp5_FWD_92	cagtgctGCAtcttttgatgaattaggattagcacc	GFP-Dbp5_REV_92	agaTGCagcactgtacaatggagaatttgggtc
GFP-Dbp5_FWD_93	cagtgctaaaGCTtttgatgaattaggattagcacc	GFP-Dbp5_REV_93	AGCtttagcactgtacaatggagaatttgggtc
GFP-Dbp5_FWD_94	cagtgctaaatctGCTgatgaattaggattagcacc	GFP-Dbp5_REV_94	agatttagcactgtacaatggagaatttgggtc
GFP-Dbp5_FWD_95	GCTgaattaggattagcaccagaactactaaagg	GFP-Dbp5_REV_95	aatcctaattcAGCaaaagatttagcactgtacaatgg
GFP-Dbp5_FWD_96	gatGCAttaggattagcaccagaactactaaagg	GFP-Dbp5_REV_96	aatcctaaTGCatcaaaagatttagcactgtacaatgg
GFP-Dbp5_FWD_97	gatgaaGCAggattagcaccagaactactaaagg	GFP-Dbp5_REV_97	atccTGCttcatcaaaagatttagcactgtacaatggag
GFP-Dbp5_FWD_98	GCAttagcaccagaactactaaaggggatatatg	GFP-Dbp5_REV_98	ctggtgctaaTGCtaattcatcaaaagatttagcactg
GFP-Dbp5_FWD_99	GCAgcaccagaactactaaaggggatatatgc	GFP-Dbp5_REV_99	gttctggtgcTGCtcctaattcatcaaaagatttagc
GFP-Dbp5_FWD_100	GGAccagaactactaaaggggatatatgctatg	GFP-Dbp5_REV_100	gtagttctggTCCtaatcctaattcatcaaaagatttag
GFP-Dbp5_FWD_101	gcaGCAgaactactaaaggggatatatgctatg	GFP-Dbp5_REV_101	gtagttcTGCtgctaatcctaattcatcaaaagatttag
GFP-Dbp5_FWD_102	agcaccaGCActactaaaggggatatatgc	GFP-Dbp5_REV_102	tagTGCtggtgctaatcctaattcatcaaaagatttag
GFP-Dbp5_FWD_103	gcaccagaaGCActaaaggggatatatgctatg	GFP-Dbp5_REV_103	gTGCttctggtgctaatcctaattcatcaaaagatttag
GFP-Dbp5_FWD_104	gcaccagaactaGCAaaggggatatatgctatg	GFP-Dbp5_REV_104	Ctagttctggtgctaatcctaattcatcaaaagatttag
GFP-Dbp5_FWD_105	gcaccagaactactaGCTgggatatatgctatg	GFP-Dbp5_REV_105	gtagttctggtgctaatcctaattcatcaaaagatttag
GFP-Dbp5_FWD_106	caccagaactactaaagGCTatatatgctatgaaatttc	GFP-Dbp5_REV_106	agtagttctggtgctaatcctaattcatcaaaagatttag
GFP-Dbp5_FWD_107	ccagaactactaaaggggGCAtatgctatgaaatttc	GFP-Dbp5_REV_107	tttagtagttctggtgctaatcctaattcatcaaaag
GFP-Dbp5_FWD_108	actactaaaggggataGCTgctatgaaatttcaaaaacc	GFP-Dbp5_REV_108	atcccctttagtagttctggtgctaatcc
GFP-Dbp5_FWD_109	ctaaaggggatatatGGTatgaaatttcaaaaaccatcc	GFP-Dbp5_REV_109	atatcccctttagtagttctggtgctaatcc
GFP-Dbp5_FWD_110	actaaaggggatatatgctGCTaaatttcaaaaaccatcc	GFP-Dbp5_REV_110	tatcccctttagtagttctggtgctaatcc
GFP-Dbp5_FWD_111	actaaaggggatatatgctatgGCAtttcaaaaaccatc	GFP-Dbp5_REV_111	tatcccctttagtagttctggtgctaatcc
GFP-Dbp5_FWD_112	GCTcaaaaaccatccaaaattcaagaaagggcgctg	GFP-Dbp5_REV_112	ggatggtttttgAGCtttcatagcatatatcccctttag
GFP-Dbp5_FWD_113	GCAaaaccatccaaaattcaagaaagggcgctg	GFP-Dbp5_REV_113	tggatggtttTGCaaatttcatagcatatatcccctttag
GFP-Dbp5_FWD_114	aGCAccatccaaaattcaagaaagggcgctg	GFP-Dbp5_REV_114	tttggatggTGCttgaaatttcatagcatatatcccctttag
GFP-Dbp5_FWD_115	aaGCAtccaaaattcaagaaagggcgctgc	GFP-Dbp5_REV_115	attttggaTGCtttttgaaatttcatagcatatatcccctttag
GFP-Dbp5_FWD_116	aaaccaGCTaaaattcaagaaagggcgctgc	GFP-Dbp5_REV_116	ttttAGCtggtttttgaaatttcatagcatatatcccctttag
GFP-Dbp5_FWD_117	ccatccGCAattcaagaaagggcgctgc	GFP-Dbp5_REV_117	gaatTGCggatggtttttgaaatttcatagcatatatcccctttag
GFP-Dbp5_FWD_118	ccatccaaaGCTcaagaaagggcgctgc	GFP-Dbp5_REV_118	gAGCtttggatggtttttgaaatttcatagcatatatcccctttag
GFP-Dbp5_FWD_119	GCAgaaagggcgctgccattattattacataatcc	GFP-Dbp5_REV_119	cagcgccctttcTGCaattttggatggtttttg
GFP-Dbp5_FWD_120	GCAagggcgctgccattattattacataatcc	GFP-Dbp5_REV_120	gcagcgccctTGCttgaattttggatgg
GFP-Dbp5_FWD_121	GCTgcgctgccattattattacataatccgcctag	GFP-Dbp5_REV_121	aatggcagcgcAGCttcttgaattttggatgg
GFP-Dbp5_FWD_122	gGGTctgccattattattacataatccgcctag	GFP-Dbp5_REV_122	taatggcagACCcctttcttgaattttggatgg
GFP-Dbp5_FWD_123	ggcgGCTccattattattacataatccgcctag	GFP-Dbp5_REV_123	taatggAGCcgccctttcttgaattttggatgg
GFP-Dbp5_FWD_124	gcgctgGCAttattattacataatccgcctag	GFP-Dbp5_REV_124	ataaTGCcagcgccctttcttgaattttggatg
GFP-Dbp5_FWD_125	cgctgccaGCAttattacataatccgcctag	GFP-Dbp5_REV_125	aaTGCtggcagcgccctttcttgaattttgg
GFP-Dbp5_FWD_126	cgctgccattaGCAttacataatccgcctag	GFP-Dbp5_REV_126	GCtaatggcagcgccctttcttgaattttgg
GFP-Dbp5_FWD_127	cgctgccattattaGCAcataatccgcctag	GFP-Dbp5_REV_127	aataatggcagcgccctttcttgaattttgg
GFP-Dbp5_FWD_128	aGCTaatccgcctaggaacatgattgctcag	GFP-Dbp5_REV_128	aggcggattAGCtaataataatggcagcgccctttc
GFP-Dbp5_FWD_129	GCTccgcctaggaacatgattgctcagtc	GFP-Dbp5_REV_129	tcctaggcggAGCatgtaataataatggcagc
GFP-Dbp5_FWD_130	aatGCTcctaggaacatgattgctcagtctc	GFP-Dbp5_REV_130	tcctaggAGCattatgtaataataatggcagcgccctttc
GFP-Dbp5_FWD_131	ccgGCTaggaacatgattgctcagtctc	GFP-Dbp5_REV_131	tgttcctAGCcggattatgtaataataatggcagc
GFP-Dbp5_FWD_132	cataatccgcctGCTaacatgattgctcagtc	GFP-Dbp5_REV_132	Caggcggattatgtaataataatggcagcgccctttc
GFP-Dbp5_FWD_133	ccgcctaggGCTatgattgctcagtctc	GFP-Dbp5_REV_133	tAGCcctaggcggattatgtaataataatggcagc
GFP-Dbp5_FWD_135	gcctaggaacatgGCTgctcagtctcaatc	GFP-Dbp5_REV_135	catgttcctaggcggattatgtaataataatggcag
GFP-Dbp5_FWD_136	catgattGGTcagtctcaatcaggtacagg	GFP-Dbp5_REV_136	ctgACCaatcatgttcctaggcggattatg
GFP-Dbp5_FWD_137	gctGCTtctcaatcaggtacaggtaaaactgc	GFP-Dbp5_REV_137	attgagaAGCagcaatcatgttcctaggcggattatg
GFP-Dbp5_FWD_138	catgattgctcagGCTcaatcaggtacagg	GFP-Dbp5_REV_138	ctgagcaatcatgttcctaggcggattatg
GFP-Dbp5_FWD_139	gctcagtctGCAtcaggtacaggtaaaactg	GFP-Dbp5_REV_139	aTGCagactgagcaatcatgttcctaggcggattatg
GFP-Dbp5_FWD_140	GCAggtacaggtaaaactgccgccttttc	GFP-Dbp5_REV_140	ttacctgtaccTGCttgagactgagcaatc
GFP-Dbp5_FWD_141	atcaGCTacaggtaaaactgccgccttttc	GFP-Dbp5_REV_141	acctgtAGCtgattgagactgagcaatcatg
GFP-Dbp5_FWD_142	caggtGCAggtaaaactgccgccttttc	GFP-Dbp5_REV_142	ttaccTGCacctgattgagactgagcaatc
GFP-Dbp5_FWD_143	atcaggtacaGCTaaaactgccgccttttc	GFP-Dbp5_REV_143	AGCtgtacctgattgagactgagcaatcatg
GFP-Dbp5_FWD_144	caggtacaggtGCAactgccgccttttc	GFP-Dbp5_REV_144	TGCacctgtacctgattgagactgagcaatc
GFP-Dbp5_FWD_145	acaggtaaaGCTgccgccttttctttaacg	GFP-Dbp5_REV_145	cAGCtttacctgtacctgattgagactgag
GFP-Dbp5_FWD_146	ggtacaggtaaaactGGTgccttttctttaacg	GFP-Dbp5_REV_146	gttttacctgtacctgattgagactgagc
GFP-Dbp5_FWD_147	caggtaaaactgccGGTttttctttaacgatgc	GFP-Dbp5_REV_147	gcagttttacctgtacctgattgagactg
GFP-Dbp5_FWD_148	aaactgccgccGCTtctttaacgatgctaac	GFP-Dbp5_REV_148	GCggcggcagttttacctgtacctgattg
GFP-Dbp5_FWD_149	aactgccgcctttGCTttaacgatgctaac	GFP-Dbp5_REV_149	GCaaaggcggcagttttacctgtacctg
GFP-Dbp5_FWD_150	ctgccgccttttctGCAacgatgctaacaag	GFP-Dbp5_REV_150	gaaaaggcggcagttttacctgtacctg
GFP-Dbp5_FWD_151	GCTatgctaacaagagtaaacccagaagacg	GFP-Dbp5_REV_151	cttgttagcatAGCtaaagaaaaggcggcag
GFP-Dbp5_FWD_152	aacgGCTctaacaagagtaaacccagaagacg	GFP-Dbp5_REV_152	tgttagAGCcgttaaagaaaaggcggcagttttac
GFP-Dbp5_FWD_153	acgatgGCAacaagagtaaacccagaagacg	GFP-Dbp5_REV_153	cttgtTGCcatcgttaaagaaaaggcggcag
GFP-Dbp5_FWD_154	GCAagagtaaacccagaagacgcatctcc	GFP-Dbp5_REV_154	gggtttactctTGCtagcatcgttaaagaaaagg
GFP-Dbp5_FWD_155	caGCAgtaaacccagaagacgcatctccac	GFP-Dbp5_REV_155	ctgggtttacTGCtgttagcatcgttaaagaaaagg
GFP-Dbp5_FWD_156	gaGCAaacccagaagacgcatctccac	GFP-Dbp5_REV_156	cttctgggttTGCtcttgttagcatcgttaaag
GFP-Dbp5_FWD_157	gtaGCTccagaagacgcatctccacagg	GFP-Dbp5_REV_157	gtcttctggAGCtactcttgttagcatcgttaaag
GFP-Dbp5_FWD_158	gtaaacGCAgaagacgcatctccacagg	GFP-Dbp5_REV_158	gtcttcTGCgtttactcttgttagcatcgttaaag
GFP-Dbp5_FWD_159	cccaGCAgacgcatctccacagg	GFP-Dbp5_REV_159	gatgcgtcTGCtgggtttactcttgttagc
GFP-Dbp5_FWD_161	ccagaagacGGAtctccacaggcaatttg	GFP-Dbp5_REV_161	gaTCCgtcttctgggtttactcttgttagc
GFP-Dbp5_FWD_162	gaagacgcaGCTccacaggcaatttgc	GFP-Dbp5_REV_162	ggAGCtgcgtcttctgggtttactcttg
GFP-Dbp5_FWD_163	GCAcaggcaatttgcttagccccctc	GFP-Dbp5_REV_163	caaattgcctgTGCagatgcgtcttctgg
GFP-Dbp5_FWD_164	ccaGCTgcaatttgcttagccccctcc	GFP-Dbp5_REV_164	gcaaattgcAGCtggagatgcgtcttctgg
GFP-Dbp5_FWD_165	ccacagGGAatttgcttagccccctc	GFP-Dbp5_REV_165	caaatTCCctgtggagatgcgtcttctgg
GFP-Dbp5_FWD_166	caggcaGCTtgcttagccccctcc	GFP-Dbp5_REV_166	agcaAGCtgcctgtggagatgcgtcttc
GFP-Dbp5_FWD_167	cacaggcaattGCTttagccccctccag	GFP-Dbp5_REV_167	GCaattgcctgtggagatgcgtcttctgg
GFP-Dbp5_FWD_168	gcGCAgccccctccagagaactg	GFP-Dbp5_REV_168	gagggggcTGCgcaaattgcctgtgg
GFP-Dbp5_FWD_169	GGTccctccagagaactggccag	GFP-Dbp5_REV_169	ctctggagggACCtaagcaaattgcctg
GFP-Dbp5_FWD_170	gccGCTtccagagaactggccag	GFP-Dbp5_REV_170	ctctggaAGCggctaagcaaattgcctg
GFP-Dbp5_FWD_171	gcccccGCTagagaactggccag	GFP-Dbp5_REV_171	ctctAGCgggggctaagcaaattgcctg
GFP-Dbp5_FWD_172	ccctccGCAgaactggccagacaaac	GFP-Dbp5_REV_172	gttcTGCggagggggctaagcaaattgc
GFP-Dbp5_FWD_173	cctccagaGCActggccagacaaac	GFP-Dbp5_REV_173	cagTGCtctggagggggctaagc
GFP-Dbp5_FWD_174	cctccagagaaGCTgccagacaaacactag	GFP-Dbp5_REV_174	GCttctctggagggggctaagcaaattgc
GFP-Dbp5_FWD_175	tccagagaactgGGTagacaaacactagaag	GFP-Dbp5_REV_175	Ccagttctctggagggggctaag
GFP-Dbp5_FWD_176	ggccGCAcaaacactagaagtcgttcagg	GFP-Dbp5_REV_176	gtgtttgTGCggccagttctctggagg
GFP-Dbp5_FWD_177	ggccagaGCAacactagaagtcgttcagg	GFP-Dbp5_REV_177	gtgtTGCtctggccagttctctggagg
GFP-Dbp5_FWD_178	ggccagacaaGCActagaagtcgttcag	GFP-Dbp5_REV_178	TGCttgtctggccagttctctggagg
GFP-Dbp5_FWD_179	ccagacaaacaGCAgaagtcgttcaggaaatg	GFP-Dbp5_REV_179	GCtgtttgtctggccagttctctggagg
GFP-Dbp5_FWD_180	gacaaacactaGCAgtcgttcaggaaatgg	GFP-Dbp5_REV_180	cTGCtagtgtttgtctggccagttctctg
GFP-Dbp5_FWD_181	cactagaaGCTgttcaggaaatgggtaagttc	GFP-Dbp5_REV_181	acAGCttctagtgtttgtctggccagttctc
GFP-Dbp5_FWD_182	acactagaagtcGCTcaggaaatgggtaag	GFP-Dbp5_REV_182	Cgacttctagtgtttgtctggccagttc
GFP-Dbp5_FWD_183	cactagaagtcgttGCTgaaatgggtaagttcac	GFP-Dbp5_REV_183	acgacttctagtgtttgtctggccagttc
GFP-Dbp5_FWD_184	agaagtcgttcagGCAatgggtaagttcac	GFP-Dbp5_REV_184	ctgaacgacttctagtgtttgtctggccag
GFP-Dbp5_FWD_185	gtcgttcaggaaGCTggtaagttcacaaaaataacc	GFP-Dbp5_REV_185	Cttcctgaacgacttctagtgtttgtctgg
GFP-Dbp5_FWD_186	gtcgttcaggaaatgGCTaagttcacaaaaataacc	GFP-Dbp5_REV_186	tttcctgaacgacttctagtgtttgtctgg
GFP-Dbp5_FWD_187	gtcgttcaggaaatgggtGCTttcacaaaaataacc	GFP-Dbp5_REV_187	tttcctgaacgacttctagtgtttgtctgg
GFP-Dbp5_FWD_188	cgttcaggaaatgggtaagGCTacaaaaataaccag	GFP-Dbp5_REV_188	cccatttcctgaacgacttctagtgtttg
GFP-Dbp5_FWD_189	ggaaatgggtaagttcGCAaaaataaccagtcag	GFP-Dbp5_REV_189	cttacccatttcctgaacgacttctagtg
GFP-Dbp5_FWD_190	cacaGCAataaccagtcagttaattgttcccgattc	GFP-Dbp5_REV_190	ggttatTGCtgtgaacttacccatttcctgaacg
GFP-Dbp5_FWD_191	cacaaaaGCAaccagtcagttaattgttcccgattc	GFP-Dbp5_REV_191	ggtTGCttttgtgaacttacccatttcctgaacg
GFP-Dbp5_FWD_192	tgggtaagttcacaaaaataGCTagtcagttaattgttc	GFP-Dbp5_REV_192	gtgaacttacccatttcctgaacgacttc
GFP-Dbp5_FWD_193	ccGCTcagttaattgttcccgattcttttgagaaaaac	GFP-Dbp5_REV_193	attaactgAGCggttatttttgtgaacttacccatttcc
GFP-Dbp5_FWD_194	agttcacaaaaataaccagtGCTttaattgttcccgattc	GFP-Dbp5_REV_194	atttttgtgaacttacccatttcctgaacgacttc
GFP-Dbp5_FWD_195	ccagtcagGCAattgttcccgattcttttgag	GFP-Dbp5_REV_195	atTGCctgactggttatttttgtgaacttacccatttcc
GFP-Dbp5_FWD_196	ccagtcagttaGCTgttcccgattcttttgag	GFP-Dbp5_REV_196	GCtaactgactggttatttttgtgaacttacccatttcc
GFP-Dbp5_FWD_197	ccagtcagttaattGCTcccgattcttttgag	GFP-Dbp5_REV_197	attaactgactggttatttttgtgaacttacccatttc
GFP-Dbp5_FWD_198	accagtcagttaattgttGCTgattcttttgagaaaaac	GFP-Dbp5_REV_198	ttaactgactggttatttttgtgaacttacccatttc
GFP-Dbp5_FWD_199	cagtcagttaattgttcccGCTtcttttgagaaaaac	GFP-Dbp5_REV_199	aattaactgactggttatttttgtgaacttacccatttc
GFP-Dbp5_FWD_200	cagttaattgttcccgatGCTtttgagaaaaacaagc	GFP-Dbp5_REV_200	gaacaattaactgactggttatttttgtgaacttacc
GFP-Dbp5_FWD_201	cccgattctGCTgagaaaaacaagcaaattaatgctc	GFP-Dbp5_REV_201	ctcAGCagaatcgggaacaattaactgactgg
GFP-Dbp5_FWD_202	tgttcccgattcttttGCTaaaaacaagcaaattaatgc	GFP-Dbp5_REV_202	agaatcgggaacaattaactgactggttatttttgtg
GFP-Dbp5_FWD_203	cccgattcttttgagGCAaacaagcaaattaatgctc	GFP-Dbp5_REV_203	ctcaaaagaatcgggaacaattaactgactgg
GFP-Dbp5_FWD_204	ttgttcccgattcttttgagaaaGCTaagcaaattaatgc	GFP-Dbp5_REV_204	gaatcgggaacaattaactgactggttatttttgtg
GFP-Dbp5_FWD_205	cccgattcttttgagaaaaacGCTcaaattaatgctcaag	GFP-Dbp5_REV_205	ctcaaaagaatcgggaacaattaactgactgg
GFP-Dbp5_FWD_206	GCAattaatgctcaagtgattgttggtacgccgggcac	GFP-Dbp5_REV_206	gagcattaatTGCcttgtttttctcaaaagaatcgggaac
GFP-Dbp5_FWD_207	caagcaaGCTaatgctcaagtgattgttggtacg	GFP-Dbp5_REV_207	gcattAGCttgcttgtttttctcaaaagaatcgggaac
GFP-Dbp5_FWD_208	GCTgctcaagtgattgttggtacgccgggcac	GFP-Dbp5_REV_208	tcacttgagcAGCaatttgcttgtttttctcaaaagaatcg
GFP-Dbp5_FWD_209	GGTcaagtgattgttggtacgccgggcac	GFP-Dbp5_REV_209	caatcacttgACCattaatttgcttgtttttctcaaaagaatc
GFP-Dbp5_FWD_210	GCAgtgattgttggtacgccgggcac	GFP-Dbp5_REV_210	accaacaatcacTGCagcattaatttgcttgtttttctc
GFP-Dbp5_FWD_211	GCTattgttggtacgccgggcactg	GFP-Dbp5_REV_211	gtaccaacaatAGCttgagcattaatttgcttgtttttc
GFP-Dbp5_FWD_212	gtgGCTgttggtacgccgggcac	GFP-Dbp5_REV_212	cgtaccaacAGCcacttgagcattaatttgcttg
GFP-Dbp5_FWD_213	GCTggtacgccgggcactgttc	GFP-Dbp5_REV_213	ccggcgtaccAGCaatcacttgagcattaatttg
GFP-Dbp5_FWD_214	GCTacgccgggcactgttcttgac	GFP-Dbp5_REV_214	tgcccggcgtAGCaacaatcacttgagc
GFP-Dbp5_FWD_215	ggtGCTccgggcactgttcttgac	GFP-Dbp5_REV_215	gtgcccggAGCaccaacaatcacttg
GFP-Dbp5_FWD_216	ggtacgGCTggcactgttcttgacc	GFP-Dbp5_REV_216	tgccAGCcgtaccaacaatcacttgagc
GFP-Dbp5_FWD_217	cgccgGCTactgttcttgacctaatgc	GFP-Dbp5_REV_217	gaacagtAGCcggcgtaccaacaatcac
GFP-Dbp5_FWD_218	gccgggcGCTgttcttgacctaatg	GFP-Dbp5_REV_218	gaacAGCgcccggcgtaccaac
GFP-Dbp5_FWD_219	gggcactGCTcttgacctaatgcgtag	GFP-Dbp5_REV_219	caagAGCagtgcccggcgtacc
GFP-Dbp5_FWD_220	cgggcactgttGCTgacctaatgcgtag	GFP-Dbp5_REV_220	cAGCaacagtgcccggcgtaccaac
GFP-Dbp5_FWD_221	ggcactgttcttGCTctaatgcgtagaaaattg	GFP-Dbp5_REV_221	Caagaacagtgcccggcgtacc
GFP-Dbp5_FWD_222	ggcactgttcttgacGCAatgcgtagaaaattg	GFP-Dbp5_REV_222	caagaacagtgcccggcgtacc
GFP-Dbp5_FWD_223	gttcttgacctaGCTcgtagaaaattgatgcagc	GFP-Dbp5_REV_223	Ctaggtcaagaacagtgcccggcgtac
GFP-Dbp5_FWD_224	ctgttcttgacctaatgGCTagaaaattgatgcagc	GFP-Dbp5_REV_224	aggtcaagaacagtgcccggcgtac
GFP-Dbp5_FWD_225	tcttgacctaatgcgtGCAaaattgatgcagctac	GFP-Dbp5_REV_225	cattaggtcaagaacagtgcccggcgtac
GFP-Dbp5_FWD_226	ttgacctaatgcgtagaGCAttgatgcagctacag	GFP-Dbp5_REV_226	tacgcattaggtcaagaacagtgcccggcgtac
GFP-Dbp5_FWD_227	GCTatgcagctacagaaaattaaaatttttgttttggatgaagc	GFP-Dbp5_REV_227	ctgtagctgcatAGCttttctacgcattaggtc
GFP-Dbp5_FWD_228	gGCTcagctacagaaaattaaaatttttgttttggatgaagc	GFP-Dbp5_REV_228	ctgtagctgAGCcaattttctacgcattaggtc
GFP-Dbp5_FWD_229	GCTctacagaaaattaaaatttttgttttggatgaagccgataac	GFP-Dbp5_REV_229	ttttctgtagAGCcatcaattttctacgcattaggtcaag
GFP-Dbp5_FWD_230	gatgcagGCAcagaaaattaaaatttttgttttggatgaagc	GFP-Dbp5_REV_230	ctgTGCctgcatcaattttctacgcattaggtc
GFP-Dbp5_FWD_231	cagctaGCTaaaattaaaatttttgttttggatgaagccgataac	GFP-Dbp5_REV_231	ttttAGCtagctgcatcaattttctacgcattaggtcaag
GFP-Dbp5_FWD_232	gcagctacagGCAattaaaatttttgttttggatgaagc	GFP-Dbp5_REV_232	TGCctgtagctgcatcaattttctacgcattagg
GFP-Dbp5_FWD_233	gcagctacagaaaGCTaaaatttttgttttggatgaagc	GFP-Dbp5_REV_233	tttctgtagctgcatcaattttctacgcattagg
GFP-Dbp5_FWD_234	gcagctacagaaaattGCAatttttgttttggatgaagc	GFP-Dbp5_REV_234	tttctgtagctgcatcaattttctacgcattagg
GFP-Dbp5_FWD_235	GCTtttgttttggatgaagccgataacatgttggatc	GFP-Dbp5_REV_235	ccaaaacaaaAGCtttaattttctgtagctgcatcaattttctac
GFP-Dbp5_FWD_236	GCTgttttggatgaagccgataacatgttggatc	GFP-Dbp5_REV_236	catccaaaacAGCaattttaattttctgtagctgcatcaattttc
GFP-Dbp5_FWD_237	GCTttggatgaagccgataacatgttggatc	GFP-Dbp5_REV_237	gcttcatccaaAGCaaaaattttaattttctgtagctgc
GFP-Dbp5_FWD_238	tGCTgatgaagccgataacatgttggatcagc	GFP-Dbp5_REV_238	ggcttcatcAGCaacaaaaattttaattttctgtagctgc
GFP-Dbp5_FWD_239	gGCTgaagccgataacatgttggatcagc	GFP-Dbp5_REV_239	atcggcttcAGCcaaaacaaaaattttaattttctgtagc
GFP-Dbp5_FWD_241	ggatgaaGGTgataacatgttggatcagcag	GFP-Dbp5_REV_241	atcACCttcatccaaaacaaaaattttaattttctgtagctgc
GFP-Dbp5_FWD_242	ccGCTaacatgttggatcagcagggtc	GFP-Dbp5_REV_242	caacatgttAGCggcttcatccaaaacaaaaattttaattttc
GFP-Dbp5_FWD_243	gccgatGCTatgttggatcagcagggtc	GFP-Dbp5_REV_243	caacatAGCatcggcttcatccaaaacaaaaattttaattttctg
GFP-Dbp5_FWD_244	gccgataacGCTttggatcagcagggtc	GFP-Dbp5_REV_244	caaAGCgttatcggcttcatccaaaacaaaaattttaattttctg
GFP-Dbp5_FWD_245	gGCTgatcagcagggtctaggtgacc	GFP-Dbp5_REV_245	ccctgctgatcAGCcatgttatcggcttc
GFP-Dbp5_FWD_246	gGCTcagcagggtctaggtgacc	GFP-Dbp5_REV_246	agaccctgctgAGCcaacatgttatcggcttc
GFP-Dbp5_FWD_247	ggatGCTcagggtctaggtgaccagtg	GFP-Dbp5_REV_247	gaccctgAGCatccaacatgttatcggcttc
GFP-Dbp5_FWD_248	ggatcagGCTggtctaggtgaccagtg	GFP-Dbp5_REV_248	gaccAGCctgatccaacatgttatcggcttc
GFP-Dbp5_FWD_249	gatcagcagGCTctaggtgaccagtg	GFP-Dbp5_REV_249	gAGCctgctgatccaacatgttatcggcttc
GFP-Dbp5_FWD_250	gcagggtGCAggtgaccagtgtattcg	GFP-Dbp5_REV_250	accTGCaccctgctgatccaacatgttatcg
GFP-Dbp5_FWD_251	gcagggtctaGCTgaccagtgtattcg	GFP-Dbp5_REV_251	AGCtagaccctgctgatccaacatgttatc
GFP-Dbp5_FWD_252	gggtctaggtGCTcagtgtattcgtgttaag	GFP-Dbp5_REV_252	gAGCacctagaccctgctgatccaac
GFP-Dbp5_FWD_253	agggtctaggtgacGCTtgtattcgtgttaag	GFP-Dbp5_REV_253	gtcacctagaccctgctgatccaac
GFP-Dbp5_FWD_254	gtctaggtgaccagGCTattcgtgttaagag	GFP-Dbp5_REV_254	tggtcacctagaccctgctgatcc
GFP-Dbp5_FWD_255	ggtgaccagtgtGCTcgtgttaagagatttttac	GFP-Dbp5_REV_255	Cacactggtcacctagaccctgctg
GFP-Dbp5_FWD_256	gaccagtgtattGCTgttaagagatttttacccaagg	GFP-Dbp5_REV_256	Caatacactggtcacctagaccctgctg
GFP-Dbp5_FWD_257	gtgaccagtgtattcgtGCTaagagatttttacc	GFP-Dbp5_REV_257	atacactggtcacctagaccctgctg
GFP-Dbp5_FWD_258	ccagtgtattcgtgttGCTagatttttacccaagg	GFP-Dbp5_REV_258	cacgaatacactggtcacctagaccctg
GFP-Dbp5_FWD_259	cgtgttaagGCAtttttacccaaggatactcaacttg	GFP-Dbp5_REV_259	aTGCcttaacacgaatacactggtcacctagac
GFP-Dbp5_FWD_260	cgtgttaagagaGCTttacccaaggatactcaac	GFP-Dbp5_REV_260	Ctctcttaacacgaatacactggtcacctag
GFP-Dbp5_FWD_261	cgtgttaagagatttGCAcccaaggatactcaac	GFP-Dbp5_REV_261	atctcttaacacgaatacactggtcacctagac
GFP-Dbp5_FWD_262	ttcgtgttaagagatttttaGCTaaggatactcaacttg	GFP-Dbp5_REV_262	ctcttaacacgaatacactggtcacctag
GFP-Dbp5_FWD_263	cccGCTgatactcaacttgttttgtttagtgctac	GFP-Dbp5_REV_263	gagtatcAGCgggtaaaaatctcttaacacgaatacac
GFP-Dbp5_FWD_264	cccaagGCTactcaacttgttttgtttagtgc	GFP-Dbp5_REV_264	gagtAGCcttgggtaaaaatctcttaacacgaatac
GFP-Dbp5_FWD_265	cccaaggatGCTcaacttgttttgtttagtgc	GFP-Dbp5_REV_265	gAGCatccttgggtaaaaatctcttaacacgaatac
GFP-Dbp5_FWD_266	cccaaggatactGCActtgttttgtttagtgctac	GFP-Dbp5_REV_266	Cagtatccttgggtaaaaatctcttaacacgaatacac
GFP-Dbp5_FWD_267	GCTgttttgtttagtgctacttttgccgatgcag	GFP-Dbp5_REV_267	ctaaacaaaacAGCttgagtatccttgggtaaaaatctc
GFP-Dbp5_FWD_268	GCTttgtttagtgctacttttgccgatgcag	GFP-Dbp5_REV_268	cactaaacaaAGCaagttgagtatccttgggtaaaaatc
GFP-Dbp5_FWD_269	GCTtttagtgctacttttgccgatgcagttagg	GFP-Dbp5_REV_269	tagcactaaaAGCaacaagttgagtatccttgggtaaaaatc
GFP-Dbp5_FWD_270	gttttgGCTagtgctacttttgccgatgcag	GFP-Dbp5_REV_270	cactAGCcaaaacaagttgagtatccttgggtaaaaatc
GFP-Dbp5_FWD_271	GCTgctacttttgccgatgcagttaggcag	GFP-Dbp5_REV_271	ggcaaaagtagcAGCaaacaaaacaagttgagtatcc
GFP-Dbp5_FWD_272	gtGGTacttttgccgatgcagttaggcag	GFP-Dbp5_REV_272	ggcaaaagtACCactaaacaaaacaagttgagtatcc
GFP-Dbp5_FWD_273	gctGCTtttgccgatgcagttaggcag	GFP-Dbp5_REV_273	cggcaaaAGCagcactaaacaaaacaagttgag
GFP-Dbp5_FWD_274	gctactGCTgccgatgcagttaggcag	GFP-Dbp5_REV_274	cggcAGCagtagcactaaacaaaacaagttgag
GFP-Dbp5_FWD_275	GGTgatgcagttaggcagtacgcaaagaag	GFP-Dbp5_REV_275	cctaactgcatcACCaaaagtagcactaaacaaaac
GFP-Dbp5_FWD_276	ccGCTgcagttaggcagtacgcaaag	GFP-Dbp5_REV_276	ctaactgcAGCggcaaaagtagcactaaac
GFP-Dbp5_FWD_277	gccgatGGAgttaggcagtacgcaaag	GFP-Dbp5_REV_277	cctaacTCCatcggcaaaagtagcactaaac
GFP-Dbp5_FWD_278	ccgatgcaGCTaggcagtacgcaaag	GFP-Dbp5_REV_278	gcctAGCtgcatcggcaaaagtagcac
GFP-Dbp5_FWD_279	gccgatgcagttGCTcagtacgcaaagaag	GFP-Dbp5_REV_279	Caactgcatcggcaaaagtagcactaaacaaaac
GFP-Dbp5_FWD_280	ccgatgcagttaggGCTtacgcaaagaagatc	GFP-Dbp5_REV_280	ctaactgcatcggcaaaagtagcactaaac
GFP-Dbp5_FWD_281	gcagttaggcagGCTgcaaagaagatcgttc	GFP-Dbp5_REV_281	Cctgcctaactgcatcggcaaaagtagc
GFP-Dbp5_FWD_282	agttaggcagtacGGAaagaagatcgttcc	GFP-Dbp5_REV_282	Cgtactgcctaactgcatcggcaaaag
GFP-Dbp5_FWD_283	ggcagtacgcaGCTaagatcgttccaaatgc	GFP-Dbp5_REV_283	GCtgcgtactgcctaactgcatcggcaaaag
GFP-Dbp5_FWD_284	ggcagtacgcaaagGCTatcgttccaaatgc	GFP-Dbp5_REV_284	tttgcgtactgcctaactgcatcggcaaaag
GFP-Dbp5_FWD_285	cagtacgcaaagaagGCTgttccaaatgctaatac	GFP-Dbp5_REV_285	cttctttgcgtactgcctaactgcatcg
GFP-Dbp5_FWD_286	gtacgcaaagaagatcGCTccaaatgctaatac	GFP-Dbp5_REV_286	cttctttgcgtactgcctaactgcatcg
GFP-Dbp5_FWD_287	gtacgcaaagaagatcgttGCAaatgctaatactttag	GFP-Dbp5_REV_287	cttctttgcgtactgcctaactgcatcg
GFP-Dbp5_FWD_288	caaagaagatcgttccaGCTgctaatactttagaattac	GFP-Dbp5_REV_288	acgatcttctttgcgtactgcctaactgc
GFP-Dbp5_FWD_289	gcaaagaagatcgttccaaatGGTaatactttagaattac	GFP-Dbp5_REV_289	cgatcttctttgcgtactgcctaactgc
GFP-Dbp5_FWD_290	gaagatcgttccaaatgctGCTactttagaattacaaac	GFP-Dbp5_REV_290	tggaacgatcttctttgcgtactgcctaac
GFP-Dbp5_FWD_291	gaagatcgttccaaatgctaatGCTttagaattacaaac	GFP-Dbp5_REV_291	tggaacgatcttctttgcgtactgcctaac
GFP-Dbp5_FWD_292	gatcgttccaaatgctaatactGCAgaattacaaacaaatg	GFP-Dbp5_REV_292	catttggaacgatcttctttgcgtactgc
GFP-Dbp5_FWD_293	GCAttacaaacaaatgaagttaatgttgatgccatcaaac	GFP-Dbp5_REV_293	ttgtttgtaaTGCtaaagtattagcatttggaacgatcttc
GFP-Dbp5_FWD_294	gaaGCAcaaacaaatgaagttaatgttgatgccatcaaac	GFP-Dbp5_REV_294	ttgtttgTGCttctaaagtattagcatttggaacgatcttc
GFP-Dbp5_FWD_295	GCAacaaatgaagttaatgttgatgccatcaaacaactatac	GFP-Dbp5_REV_295	cttcatttgtTGCtaattctaaagtattagcatttggaacgatc
GFP-Dbp5_FWD_296	acaaGCAaatgaagttaatgttgatgccatcaaacaac	GFP-Dbp5_REV_296	cttcattTGCttgtaattctaaagtattagcatttggaacg
GFP-Dbp5_FWD_297	tacaaacaGCTgaagttaatgttgatgccatcaaacaac	GFP-Dbp5_REV_297	cttcAGCtgtttgtaattctaaagtattagcatttggaacg
GFP-Dbp5_FWD_298	GCAgttaatgttgatgccatcaaacaactatacatgg	GFP-Dbp5_REV_298	caacattaacTGCatttgtttgtaattctaaagtattagcatttgg
GFP-Dbp5_FWD_299	GCTaatgttgatgccatcaaacaactatacatggac	GFP-Dbp5_REV_299	gcatcaacattAGCttcatttgtttgtaattctaaagtattagc
GFP-Dbp5_FWD_300	GCTgttgatgccatcaaacaactatacatggactg	GFP-Dbp5_REV_300	gatggcatcaacAGCaacttcatttgtttgtaattctaaag
GFP-Dbp5_FWD_301	GCTgatgccatcaaacaactatacatggactg	GFP-Dbp5_REV_301	tgatggcatcAGCattaacttcatttgtttgtaattctaaag
GFP-Dbp5_FWD_302	GCTgccatcaaacaactatacatggactgc	GFP-Dbp5_REV_302	gtttgatggcAGCaacattaacttcatttgtttgtaattc
GFP-Dbp5_FWD_303	gatGGTatcaaacaactatacatggactgcaaaaacg	GFP-Dbp5_REV_303	gtttgatACCatcaacattaacttcatttgtttgtaattctaaagtattag
GFP-Dbp5_FWD_304	gttgatgccGCTaaacaactatacatggactgc	GFP-Dbp5_REV_304	tAGCggcatcaacattaacttcatttgtttgtaattctaaagtattag
GFP-Dbp5_FWD_305	tgatgccatcGCAcaactatacatggactgc	GFP-Dbp5_REV_305	gTGCgatggcatcaacattaacttcatttgtttgtaattc
GFP-Dbp5_FWD_306	gttgatgccatcaaaGCActatacatggactgc	GFP-Dbp5_REV_306	tgatggcatcaacattaacttcatttgtttgtaattctaaag
GFP-Dbp5_FWD_307	gccatcaaacaaGCAtacatggactgcaaaaacg	GFP-Dbp5_REV_307	Cttgtttgatggcatcaacattaacttcatttgtttgtaattc
GFP-Dbp5_FWD_308	gccatcaaacaactaGCTatggactgcaaaaacg	GFP-Dbp5_REV_308	gttgtttgatggcatcaacattaacttcatttgtttg
GFP-Dbp5_FWD_309	caaacaactatacGCTgactgcaaaaacgaagcag	GFP-Dbp5_REV_309	gtatagttgtttgatggcatcaacattaacttcatttg
GFP-Dbp5_FWD_310	caaacaactatacatgGCTtgcaaaaacgaagcag	GFP-Dbp5_REV_310	gtatagttgtttgatggcatcaacattaacttcatttg
GFP-Dbp5_FWD_311	caaacaactatacatggacGCTaaaaacgaagcagataag	GFP-Dbp5_REV_311	tgtatagttgtttgatggcatcaacattaacttcatttg
GFP-Dbp5_FWD_312	catggactgcGCAaacgaagcagataagtttg	GFP-Dbp5_REV_312	TGCgcagtccatgtatagttgtttgatggcatc
GFP-Dbp5_FWD_313	catggactgcaaaGCTgaagcagataagtttgatg	GFP-Dbp5_REV_313	tttgcagtccatgtatagttgtttgatggcatc
GFP-Dbp5_FWD_314	ggactgcaaaaacGCAgcagataagtttgatg	GFP-Dbp5_REV_314	Cgtttttgcagtccatgtatagttgtttgatgg
GFP-Dbp5_FWD_316	gactgcaaaaacgaagcaGCTaagtttgatgttttaac	GFP-Dbp5_REV_316	cgtttttgcagtccatgtatagttgtttgatgg
GFP-Dbp5_FWD_317	ggactgcaaaaacgaagcagatGCTtttgatgttttaac	GFP-Dbp5_REV_317	cgtttttgcagtccatgtatagttgtttgatgg
GFP-Dbp5_FWD_318	gcaaaaacgaagcagataagGCTgatgttttaactgag	GFP-Dbp5_REV_318	ctgcttcgtttttgcagtccatgtatagttg
GFP-Dbp5_FWD_319	cgaagcagataagtttGCTgttttaactgagctatatg	GFP-Dbp5_REV_319	cttatctgcttcgtttttgcagtccatgtatag
GFP-Dbp5_FWD_320	cgaagcagataagtttgatGCTttaactgagctatatg	GFP-Dbp5_REV_320	cttatctgcttcgtttttgcagtccatgtatag
GFP-Dbp5_FWD_321	gaagcagataagtttgatgttGCAactgagctatatgg	GFP-Dbp5_REV_321	acttatctgcttcgtttttgcagtccatgtatag
GFP-Dbp5_FWD_322	GCTgagctatatggtttaatgacaattggatcttcc	GFP-Dbp5_REV_322	catatagctcAGCtaaaacatcaaacttatctgcttcg
GFP-Dbp5_FWD_323	ttaactGCTctatatggtttaatgacaattggatcttcc	GFP-Dbp5_REV_323	atagAGCagttaaaacatcaaacttatctgcttcgtttttg
GFP-Dbp5_FWD_324	ttaactgagGCAtatggtttaatgacaattggatcttcc	GFP-Dbp5_REV_324	aTGCctcagttaaaacatcaaacttatctgcttcgtttttg
GFP-Dbp5_FWD_325	ctgagctaGCTggtttaatgacaattggatcttcc	GFP-Dbp5_REV_325	ccAGCtagctcagttaaaacatcaaacttatctgcttc
GFP-Dbp5_FWD_326	taactgagctatatGCTttaatgacaattggatcttcc	GFP-Dbp5_REV_326	atatagctcagttaaaacatcaaacttatctgcttcg
GFP-Dbp5_FWD_327	ctgagctatatggtGCAatgacaattggatcttcc	GFP-Dbp5_REV_327	ccatatagctcagttaaaacatcaaacttatctgcttc
GFP-Dbp5_FWD_328	tttaactgagctatatggtttaGCTacaattggatcttcc	GFP-Dbp5_REV_328	tagctcagttaaaacatcaaacttatctgcttcgtttttg
GFP-Dbp5_FWD_329	ggtttaatgGCAattggatcttccattatttttgttgc	GFP-Dbp5_REV_329	tTGCcattaaaccatatagctcagttaaaacatcaaacttatc
GFP-Dbp5_FWD_330	tggtttaatgacaGCTggatcttccattatttttgttgc	GFP-Dbp5_REV_330	tgtcattaaaccatatagctcagttaaaacatcaaacttatc
GFP-Dbp5_FWD_331	ggtttaatgacaattGCAtcttccattatttttgttgcaac	GFP-Dbp5_REV_331	ttgtcattaaaccatatagctcagttaaaacatcaaacttatc
GFP-Dbp5_FWD_332	ggtttaatgacaattggaGCTtccattatttttgttgc	GFP-Dbp5_REV_332	ttgtcattaaaccatatagctcagttaaaacatcaaacttatc
GFP-Dbp5_FWD_333	tctGCTattatttttgttgcaaccaaaaaaaccgcaaac	GFP-Dbp5_REV_333	aaataatAGCagatccaattgtcattaaaccatatagctcag
GFP-Dbp5_FWD_334	ccGCTatttttgttgcaaccaaaaaaaccgcaaacg	GFP-Dbp5_REV_334	acaaaaatAGCggaagatccaattgtcattaaaccatatagc
GFP-Dbp5_FWD_335	ccattGCTtttgttgcaaccaaaaaaaccgcaaacg	GFP-Dbp5_REV_335	acaaaAGCaatggaagatccaattgtcattaaaccatatagc
GFP-Dbp5_FWD_336	ccattattGCTgttgcaaccaaaaaaaccgcaaacg	GFP-Dbp5_REV_336	acAGCaataatggaagatccaattgtcattaaaccatatagc
GFP-Dbp5_FWD_337	GCTgcaaccaaaaaaaccgcaaacgttttatatgg	GFP-Dbp5_REV_337	ttttggttgcAGCaaaaataatggaagatccaattgtc
GFP-Dbp5_FWD_338	cttccattatttttgttGGAaccaaaaaaaccgcaaac	GFP-Dbp5_REV_338	aaaataatggaagatccaattgtcattaaaccatatagctc
GFP-Dbp5_FWD_339	tcttccattatttttgttgcaGCTaaaaaaaccgcaaac	GFP-Dbp5_REV_339	aaataatggaagatccaattgtcattaaaccatatagctc
GFP-Dbp5_FWD_340	gttgcaaccGCAaaaaccgcaaacgttttatatgg	GFP-Dbp5_REV_340	ttTGCggttgcaacaaaaataatggaagatccaattgtc
GFP-Dbp5_FWD_341	gttgcaaccaaaGCAaccgcaaacgttttatatgg	GFP-Dbp5_REV_341	Ctttggttgcaacaaaaataatggaagatccaattgtc
GFP-Dbp5_FWD_342	GCTgcaaacgttttatatgggaaattgaaaagtgaagg	GFP-Dbp5_REV_342	aaacgtttgcAGCttttttggttgcaacaaaaataatgg
GFP-Dbp5_FWD_343	ccGGAaacgttttatatgggaaattgaaaagtgaagg	GFP-Dbp5_REV_343	aaaacgttTCCggtttttttggttgcaacaaaaataatgg
GFP-Dbp5_FWD_344	ccgcaGCTgttttatatgggaaattgaaaagtgaagg	GFP-Dbp5_REV_344	aaaacAGCtgcggtttttttggttgcaacaaaaataatgg
GFP-Dbp5_FWD_345	ccgcaaacGCTttatatgggaaattgaaaagtgaag	GFP-Dbp5_REV_345	aaAGCgtttgcggtttttttggttgcaacaaaaataatg
GFP-Dbp5_FWD_346	ccgcaaacgttGCAtatgggaaattgaaaagtgaag	GFP-Dbp5_REV_346	GCaacgtttgcggtttttttggttgcaacaaaaataatg
GFP-Dbp5_FWD_347	ccgcaaacgttttaGCTgggaaattgaaaagtgaag	GFP-Dbp5_REV_347	aaaacgtttgcggtttttttggttgcaacaaaaataatg
GFP-Dbp5_FWD_348	aaccgcaaacgttttatatGCTaaattgaaaagtgaagg	GFP-Dbp5_REV_348	aacgtttgcggtttttttggttgcaacaaaaataatg
GFP-Dbp5_FWD_349	cgcaaacgttttatatgggGCAttgaaaagtgaagg	GFP-Dbp5_REV_349	taaaacgtttgcggtttttttggttgcaacaaaaataatg
GFP-Dbp5_FWD_350	GCTaaaagtgaaggtcatgaagtttctatcttgcatgg	GFP-Dbp5_REV_350	cttcacttttAGCtttcccatataaaacgtttgcggtttttttg
GFP-Dbp5_FWD_351	gGCAagtgaaggtcatgaagtttctatcttgcatg	GFP-Dbp5_REV_351	gaccttcactTGCcaatttcccatataaaacgtttgc
GFP-Dbp5_FWD_352	GCTgaaggtcatgaagtttctatcttgcatggtg	GFP-Dbp5_REV_352	catgaccttcAGCtttcaatttcccatataaaacgtttg
GFP-Dbp5_FWD_353	gtGCAggtcatgaagtttctatcttgcatgg	GFP-Dbp5_REV_353	cttcatgaccTGCacttttcaatttcccatataaaacg
GFP-Dbp5_FWD_354	gtgaaGCTcatgaagtttctatcttgcatggtg	GFP-Dbp5_REV_354	cttcatgAGCttcacttttcaatttcccatataaaacg
GFP-Dbp5_FWD_355	gtgaaggtGCTgaagtttctatcttgcatggtg	GFP-Dbp5_REV_355	tcAGCaccttcacttttcaatttcccatataaaacgtttg
GFP-Dbp5_FWD_356	gtgaaggtcatGCAgtttctatcttgcatgg	GFP-Dbp5_REV_356	cTGCatgaccttcacttttcaatttcccatataaaacg
GFP-Dbp5_FWD_357	gtgaaggtcatgaaGCTtctatcttgcatgg	GFP-Dbp5_REV_357	ttcatgaccttcacttttcaatttcccatataaaacg
GFP-Dbp5_FWD_358	ggtcatgaagttGCTatcttgcatggtgatttac	GFP-Dbp5_REV_358	Caacttcatgaccttcacttttcaatttcccatataaaac
GFP-Dbp5_FWD_359	ggtcatgaagtttctGCTttgcatggtgatttacag	GFP-Dbp5_REV_359	aaacttcatgaccttcacttttcaatttcccatataaaac
GFP-Dbp5_FWD_360	cGCTcatggtgatttacagacacaagaaagagac	GFP-Dbp5_REV_360	atcaccatgAGCgatagaaacttcatgaccttcac
GFP-Dbp5_FWD_361	gGCTggtgatttacagacacaagaaagagacag	GFP-Dbp5_REV_361	gtaaatcaccAGCcaagatagaaacttcatgaccttc
GFP-Dbp5_FWD_362	gcatGCTgatttacagacacaagaaagagacag	GFP-Dbp5_REV_362	gtaaatcAGCatgcaagatagaaacttcatgaccttc
GFP-Dbp5_FWD_363	gcatggtGCTttacagacacaagaaagagac	GFP-Dbp5_REV_363	taaAGCaccatgcaagatagaaacttcatgaccttc
GFP-Dbp5_FWD_364	gcatggtgatGCAcagacacaagaaagagac	GFP-Dbp5_REV_364	gTGCatcaccatgcaagatagaaacttcatgacc
GFP-Dbp5_FWD_365	cttgcatggtgatttaGCTacacaagaaagagacag	GFP-Dbp5_REV_365	atcaccatgcaagatagaaacttcatgaccttc
GFP-Dbp5_FWD_366	catggtgatttacagGCAcaagaaagagacag	GFP-Dbp5_REV_366	gtaaatcaccatgcaagatagaaacttcatgacc
GFP-Dbp5_FWD_367	cagacaGCAgaaagagacagattaatagacgacttc	GFP-Dbp5_REV_367	ctttcTGCtgtctgtaaatcaccatgcaagatagaaac
GFP-Dbp5_FWD_368	cagacacaaGCAagagacagattaatagacgac	GFP-Dbp5_REV_368	ctTGCttgtgtctgtaaatcaccatgcaagatag
GFP-Dbp5_FWD_369	gaaGCAgacagattaatagacgacttcagagagg	GFP-Dbp5_REV_369	atctgtcTGCttcttgtgtctgtaaatcaccatgc
GFP-Dbp5_FWD_370	GCTagattaatagacgacttcagagagggtag	GFP-Dbp5_REV_370	gtctattaatctAGCtctttcttgtgtctgtaaatcacc
GFP-Dbp5_FWD_371	gacGCAttaatagacgacttcagagagggtag	GFP-Dbp5_REV_371	gtctattaaTGCgtctctttcttgtgtctgtaaatcacc
GFP-Dbp5_FWD_372	agagacagaGCAatagacgacttcagagagg	GFP-Dbp5_REV_372	tTGCtctgtctctttcttgtgtctgtaaatcaccatg
GFP-Dbp5_FWD_373	agagacagattaGCAgacgacttcagagagg	GFP-Dbp5_REV_373	Ctaatctgtctctttcttgtgtctgtaaatcaccatg
GFP-Dbp5_FWD_374	ataGCTgacttcagagagggtagatccaaag	GFP-Dbp5_REV_374	ctgaagtcAGCtattaatctgtctctttcttgtgtc
GFP-Dbp5_FWD_375	atagacGCTttcagagagggtagatccaaag	GFP-Dbp5_REV_375	ctgaaAGCgtctattaatctgtctctttcttgtgtc
GFP-Dbp5_FWD_376	gattaatagacgacGCTagagagggtagatcc	GFP-Dbp5_REV_376	gtcgtctattaatctgtctctttcttgtgtctg
GFP-Dbp5_FWD_377	atagacgacttcGCAgagggtagatccaaag	GFP-Dbp5_REV_377	Cgaagtcgtctattaatctgtctctttcttgtgtc
GFP-Dbp5_FWD_378	cgacttcagaGCTggtagatccaaagttttg	GFP-Dbp5_REV_378	ccAGCtctgaagtcgtctattaatctgtctc
GFP-Dbp5_FWD_379	cgacttcagagagGCTagatccaaagttttg	GFP-Dbp5_REV_379	Cctctctgaagtcgtctattaatctgtctc
GFP-Dbp5_FWD_380	gacttcagagagggtGCAtccaaagttttgattac	GFP-Dbp5_REV_380	ccctctctgaagtcgtctattaatctgtc
GFP-Dbp5_FWD_381	gacttcagagagggtagaGCTaaagttttgattac	GFP-Dbp5_REV_381	ccctctctgaagtcgtctattaatctgtc
GFP-Dbp5_FWD_382	cagagagggtagatccGCAgttttgattactac	GFP-Dbp5_REV_382	tctaccctctctgaagtcgtctattaatctg
GFP-Dbp5_FWD_383	GCTttgattactactaatgtcctggcccgtg	GFP-Dbp5_REV_383	gtagtaatcaaAGCtttggatctaccctctctg
GFP-Dbp5_FWD_384	agttGCTattactactaatgtcctggcccgtg	GFP-Dbp5_REV_384	agtaatAGCaactttggatctaccctctctgaagtc
GFP-Dbp5_FWD_385	gGCTactactaatgtcctggcccgtgg	GFP-Dbp5_REV_385	cattagtagtAGCcaaaactttggatctaccctctc
GFP-Dbp5_FWD_386	gattGCTactaatgtcctggcccgtgg	GFP-Dbp5_REV_386	cattagtAGCaatcaaaactttggatctaccctctc
GFP-Dbp5_FWD_387	gattactGCTaatgtcctggcccgtgg	GFP-Dbp5_REV_387	cattAGCagtaatcaaaactttggatctaccctctc
GFP-Dbp5_FWD_388	gattactactGCTgtcctggcccgtgg	GFP-Dbp5_REV_388	cAGCagtagtaatcaaaactttggatctaccctctc
GFP-Dbp5_FWD_389	GCTctggcccgtggtattgatattcctac	GFP-Dbp5_REV_389	cacgggccagAGCattagtagtaatcaaaac
GFP-Dbp5_FWD_390	gtcGCTgcccgtggtattgatattcctactg	GFP-Dbp5_REV_390	ccacgggcAGCgacattagtagtaatcaaaac
GFP-Dbp5_FWD_391	ctaatgtcctgGGTcgtggtattgatattcc	GFP-Dbp5_REV_391	gACCcaggacattagtagtaatcaaaactttggatc
GFP-Dbp5_FWD_392	ctaatgtcctggccGCTggtattgatattcc	GFP-Dbp5_REV_392	ggccaggacattagtagtaatcaaaactttgg
GFP-Dbp5_FWD_393	gtcctggcccgtGCTattgatattcctac	GFP-Dbp5_REV_393	Cacgggccaggacattagtagtaatcaaaac
GFP-Dbp5_FWD_394	ggcccgtggtGCTgatattcctactgtc	GFP-Dbp5_REV_394	cAGCaccacgggccaggacattagtag
GFP-Dbp5_FWD_395	gcccgtggtattGCTattcctactgtctc	GFP-Dbp5_REV_395	Caataccacgggccaggacattagtag
GFP-Dbp5_FWD_396	ccgtggtattgatGCTcctactgtctcaatg	GFP-Dbp5_REV_396	atcaataccacgggccaggacattagtag
GFP-Dbp5_FWD_397	cgtggtattgatattGCTactgtctcaatggttg	GFP-Dbp5_REV_397	aatatcaataccacgggccaggacattag
GFP-Dbp5_FWD_398	cctGCTgtctcaatggttgtcaactatgatc	GFP-Dbp5_REV_398	ttgagacAGCaggaatatcaataccacgggccag
GFP-Dbp5_FWD_399	GCTtcaatggttgtcaactatgatcttccaacg	GFP-Dbp5_REV_399	caaccattgaAGCagtaggaatatcaataccacg
GFP-Dbp5_FWD_401	GCTgttgtcaactatgatcttccaacgcttgc	GFP-Dbp5_REV_401	agttgacaacAGCtgagacagtaggaatatcaatacc
GFP-Dbp5_FWD_402	tgGCTgtcaactatgatcttccaacgcttg	GFP-Dbp5_REV_402	catagttgacAGCcattgagacagtaggaatatc
GFP-Dbp5_FWD_403	tggttGCTaactatgatcttccaacgcttgc	GFP-Dbp5_REV_403	aAGCgacaaccattgagacagtaggaatatcaatacc
GFP-Dbp5_FWD_404	atggttgtcGCTtatgatcttccaacgcttgc	GFP-Dbp5_REV_404	aAGCgacaaccattgagacagtaggaatatcaatacc
GFP-Dbp5_FWD_405	cGCTgatcttccaacgcttgctaacggac	GFP-Dbp5_REV_405	tggaagatcAGCgttgacaaccattgagacag
GFP-Dbp5_FWD_406	GCTcttccaacgcttgctaacggacaag	GFP-Dbp5_REV_406	gcgttggaagAGCatagttgacaaccattg
GFP-Dbp5_FWD_407	GCTccaacgcttgctaacggacaagcag	GFP-Dbp5_REV_407	agcaagcgttggAGCatcatagttgacaacc
GFP-Dbp5_FWD_408	cttGCAacgcttgctaacggacaagcag	GFP-Dbp5_REV_408	gcaagcgtTGCaagatcatagttgacaacc
GFP-Dbp5_FWD_409	cttccaGCTcttgctaacggacaagcag	GFP-Dbp5_REV_409	agcaagAGCtggaagatcatagttgacaacc
GFP-Dbp5_FWD_410	cgGCTgctaacggacaagcagatccag	GFP-Dbp5_REV_410	tccgttagcAGCcgttggaagatcatagttg
GFP-Dbp5_FWD_411	cgcttGGTaacggacaagcagatccag	GFP-Dbp5_REV_411	ccgttACCaagcgttggaagatcatagttg
GFP-Dbp5_FWD_412	cgcttgctGCTggacaagcagatccag	GFP-Dbp5_REV_412	ccAGCagcaagcgttggaagatcatagttgac
GFP-Dbp5_FWD_413	gcttgctaacGCAcaagcagatccagc	GFP-Dbp5_REV_413	tgTGCgttagcaagcgttggaagatcatag
GFP-Dbp5_FWD_414	cttgctaacggaGCAgcagatccagctac	GFP-Dbp5_REV_414	TGCtccgttagcaagcgttggaagatcatag
GFP-Dbp5_FWD_415	gctaacggacaaGGAgatccagctacttac	GFP-Dbp5_REV_415	Cttgtccgttagcaagcgttggaagatc
GFP-Dbp5_FWD_416	cggacaagcaGCTccagctacttacattc	GFP-Dbp5_REV_416	AGCtgcttgtccgttagcaagcgttgg
GFP-Dbp5_FWD_417	ggacaagcagatGCAgctacttacattcac	GFP-Dbp5_REV_417	Catctgcttgtccgttagcaagcgttgg
GFP-Dbp5_FWD_418	gacaagcagatccaGGTacttacattcacag	GFP-Dbp5_REV_418	Ctggatctgcttgtccgttagcaagc
GFP-Dbp5_FWD_419	gcagatccagctGCTtacattcacagaatc	GFP-Dbp5_REV_419	GCagctggatctgcttgtccgttagc
GFP-Dbp5_FWD_420	gatccagctactGCTattcacagaatcggtag	GFP-Dbp5_REV_420	Cagtagctggatctgcttgtccgttagc
GFP-Dbp5_FWD_421	atccagctacttacGCTcacagaatcggtag	GFP-Dbp5_REV_421	taagtagctggatctgcttgtccgttagc
GFP-Dbp5_FWD_422	cattGCTagaatcggtagaaccggtagattcg	GFP-Dbp5_REV_422	ccgattctAGCaatgtaagtagctggatctgc
GFP-Dbp5_FWD_423	GCAatcggtagaaccggtagattcggcag	GFP-Dbp5_REV_423	gttctaccgatTGCgtgaatgtaagtagctgg
GFP-Dbp5_FWD_424	gaGCTggtagaaccggtagattcggcag	GFP-Dbp5_REV_424	gttctaccAGCtctgtgaatgtaagtagctgg
GFP-Dbp5_FWD_425	gaatcGCTagaaccggtagattcggcag	GFP-Dbp5_REV_425	cggttctAGCgattctgtgaatgtaagtagc
GFP-Dbp5_FWD_426	gaatcggtGCAaccggtagattcggcag	GFP-Dbp5_REV_426	cggtTGCaccgattctgtgaatgtaagtagc
GFP-Dbp5_FWD_427	gaatcggtagaGCTggtagattcggcag	GFP-Dbp5_REV_427	GCtctaccgattctgtgaatgtaagtagctg
GFP-Dbp5_FWD_428	ccGCTagattcggcagaaaaggtgttgc	GFP-Dbp5_REV_428	gccgaatctAGCggttctaccgattctg
GFP-Dbp5_FWD_429	ccggtGCAttcggcagaaaaggtgttgc	GFP-Dbp5_REV_429	gccgaaTGCaccggttctaccgattctg
GFP-Dbp5_FWD_430	ccggtagaGCTggcagaaaaggtgttgc	GFP-Dbp5_REV_430	gccAGCtctaccggttctaccgattctg
GFP-Dbp5_FWD_431	gaaccggtagattcGCTagaaaaggtgttgc	GFP-Dbp5_REV_431	Cgaatctaccggttctaccgattctgtg
GFP-Dbp5_FWD_432	gtagattcggcGCAaaaggtgttgccatttc	GFP-Dbp5_REV_432	GCgccgaatctaccggttctaccgattc
GFP-Dbp5_FWD_433	gattcggcagaGCAggtgttgccatttcc	GFP-Dbp5_REV_433	cTGCtctgccgaatctaccggttctacc
GFP-Dbp5_FWD_434	tcggcagaaaaGCTgttgccatttcctttg	GFP-Dbp5_REV_434	GCttttctgccgaatctaccggttctacc
GFP-Dbp5_FWD_435	gcagaaaaggtGCTgccatttcctttgtac	GFP-Dbp5_REV_435	GCaccttttctgccgaatctaccggttc
GFP-Dbp5_FWD_436	ggcagaaaaggtgttGGTatttcctttgtacatg	GFP-Dbp5_REV_436	caccttttctgccgaatctaccggttc
GFP-Dbp5_FWD_437	gaaaaggtgttgccGCTtcctttgtacatgac	GFP-Dbp5_REV_437	ggcaacaccttttctgccgaatctacc
GFP-Dbp5_FWD_438	aaaaggtgttgccattGCTtttgtacatgacaaaaattc	GFP-Dbp5_REV_438	ggcaacaccttttctgccgaatctacc
GFP-Dbp5_FWD_439	ggtgttgccatttccGCTgtacatgacaaaaattc	GFP-Dbp5_REV_439	ggaaatggcaacaccttttctgccgaatc
GFP-Dbp5_FWD_440	ggtgttgccatttcctttGCAcatgacaaaaattc	GFP-Dbp5_REV_440	ggaaatggcaacaccttttctgccgaatc
GFP-Dbp5_FWD_441	ggtgttgccatttcctttgtaGCTgacaaaaattctttc	GFP-Dbp5_REV_441	ggaaatggcaacaccttttctgccgaatc
GFP-Dbp5_FWD_442	gccatttcctttgtacatGCTaaaaattctttcaatattttatctg	GFP-Dbp5_REV_442	caaaggaaatggcaacaccttttctgccgaatc
GFP-Dbp5_FWD_443	gccatttcctttgtacatgacGCAaattctttcaatattttatc	GFP-Dbp5_REV_443	caaaggaaatggcaacaccttttctgccgaatc
GFP-Dbp5_FWD_444	GCTtctttcaatattttatctgcaattcagaaatacttcggtg	GFP-Dbp5_REV_444	tattgaaagaAGCtttgtcatgtacaaaggaaatggcaac
GFP-Dbp5_FWD_445	GCTttcaatattttatctgcaattcagaaatacttcggtg	GFP-Dbp5_REV_445	aaatattgaaAGCatttttgtcatgtacaaaggaaatggcaac
GFP-Dbp5_FWD_446	ctGCTaatattttatctgcaattcagaaatacttcggtgatatag	GFP-Dbp5_REV_446	aaaatattAGCagaatttttgtcatgtacaaaggaaatggcaacac
GFP-Dbp5_FWD_447	ctttcGCTattttatctgcaattcagaaatacttcggtg	GFP-Dbp5_REV_447	aaaatAGCgaaagaatttttgtcatgtacaaaggaaatggcaac
GFP-Dbp5_FWD_448	ctttcaatGCTttatctgcaattcagaaatacttcggtg	GFP-Dbp5_REV_448	aaAGCattgaaagaatttttgtcatgtacaaaggaaatggcaac
GFP-Dbp5_FWD_449	ctttcaatattGCAtctgcaattcagaaatacttcggtg	GFP-Dbp5_REV_449	GCaatattgaaagaatttttgtcatgtacaaaggaaatggcaac
GFP-Dbp5_FWD_450	taGCTgcaattcagaaatacttcggtgatatagaaatg	GFP-Dbp5_REV_450	tgaattgcAGCtaaaatattgaaagaatttttgtcatgtacaaagg
GFP-Dbp5_FWD_451	tctGGAattcagaaatacttcggtgatatagaaatgac	GFP-Dbp5_REV_451	tctgaatTCCagataaaatattgaaagaatttttgtcatgtacaaag
GFP-Dbp5_FWD_452	ctgcaGCTcagaaatacttcggtgatatagaaatgac	GFP-Dbp5_REV_452	ttctgAGCtgcagataaaatattgaaagaatttttgtcatgtacaaag
GFP-Dbp5_FWD_453	GCTaaatacttcggtgatatagaaatgactcgtgttcc	GFP-Dbp5_REV_453	cgaagtatttAGCaattgcagataaaatattgaaagaatttttgtcatg
GFP-Dbp5_FWD_454	cagGCAtacttcggtgatatagaaatgactcgtg	GFP-Dbp5_REV_454	ccgaagtaTGCctgaattgcagataaaatattgaaagaatttttg
GFP-Dbp5_FWD_455	GCTttcggtgatatagaaatgactcgtgttccaac	GFP-Dbp5_REV_455	tatcaccgaaAGCtttctgaattgcagataaaatattgaaagaatttttg
GFP-Dbp5_FWD_456	cGCTggtgatatagaaatgactcgtgttccaac	GFP-Dbp5_REV_456	ctatatcaccAGCgtatttctgaattgcagataaaatattgaaag
GFP-Dbp5_FWD_457	cGCTgatatagaaatgactcgtgttccaacg	GFP-Dbp5_REV_457	ttctatatcAGCgaagtatttctgaattgcagataaaatattgaaag
GFP-Dbp5_FWD_458	cttcggtGCTatagaaatgactcgtgttcc	GFP-Dbp5_REV_458	ctatAGCaccgaagtatttctgaattgcagataaaatattg
GFP-Dbp5_FWD_459	acttcggtgatGCAgaaatgactcgtgttcc	GFP-Dbp5_REV_459	cTGCatcaccgaagtatttctgaattgcagataaaatattg
GFP-Dbp5_FWD_460	cttcggtgatataGCAatgactcgtgttcc	GFP-Dbp5_REV_460	Ctatatcaccgaagtatttctgaattgcagataaaatattg
GFP-Dbp5_FWD_461	GCTactcgtgttccaacggatgattgggatg	GFP-Dbp5_REV_461	ggaacacgagtAGCttctatatcaccgaagtatttc
GFP-Dbp5_FWD_462	GCTcgtgttccaacggatgattgggatg	GFP-Dbp5_REV_462	cgttggaacacgAGCcatttctatatcacc
GFP-Dbp5_FWD_463	atgactGCTgttccaacggatgattgggatg	GFP-Dbp5_REV_463	ggaacAGCagtcatttctatatcaccgaagtatttctg
GFP-Dbp5_FWD_464	ctcgtGCTccaacggatgattgggatg	GFP-Dbp5_REV_464	cgttggAGCacgagtcatttctatatcacc
GFP-Dbp5_FWD_465	gactcgtgttGCAacggatgattgggatg	GFP-Dbp5_REV_465	gtTGCaacacgagtcatttctatatcaccgaag
GFP-Dbp5_FWD_466	ctcgtgttccaGCTgatgattgggatgaag	GFP-Dbp5_REV_466	cAGCtggaacacgagtcatttctatatcacc
GFP-Dbp5_FWD_467	gttccaacgGCTgattgggatgaagtcg	GFP-Dbp5_REV_467	cAGCcgttggaacacgagtcatttctatatc
GFP-Dbp5_FWD_468	caacggatGCTtgggatgaagtcgaaaaaatag	GFP-Dbp5_REV_468	cccaAGCatccgttggaacacgagtc
GFP-Dbp5_FWD_469	gttccaacggatgatGCTgatgaagtcgaaaaaatag	GFP-Dbp5_REV_469	catccgttggaacacgagtcatttctatatc
GFP-Dbp5_FWD_470	caacggatgattggGCTgaagtcgaaaaaatag	GFP-Dbp5_REV_470	Cccaatcatccgttggaacacgagtc
GFP-Dbp5_FWD_471	cggatgattgggatGCAgtcgaaaaaatagttaag	GFP-Dbp5_REV_471	tcccaatcatccgttggaacacgagtc
GFP-Dbp5_FWD_472	caacggatgattgggatgaaGCTgaaaaaatagttaag	GFP-Dbp5_REV_472	cccaatcatccgttggaacacgagtc
GFP-Dbp5_FWD_473	ggatgattgggatgaagtcGCAaaaatagttaagaaag	GFP-Dbp5_REV_473	catcccaatcatccgttggaacacgag
GFP-Dbp5_FWD_474	gatgattgggatgaagtcgaaGCAatagttaagaaagtg	GFP-Dbp5_REV_474	catcccaatcatccgttggaacacgag
GFP-Dbp5_FWD_475	tgggatgaagtcgaaaaaGCAgttaagaaagtgttaaag	GFP-Dbp5_REV_475	cgacttcatcccaatcatccgttggaac
GFP-Dbp5_FWD_476	gggatgaagtcgaaaaaataGCTaagaaagtgttaaag	GFP-Dbp5_REV_476	tcgacttcatcccaatcatccgttggaac
GFP-Dbp5_FWD_477	ggatgaagtcgaaaaaatagttGCTaaagtgttaaaggattag	GFP-Dbp5_REV_477	ttttcgacttcatcccaatcatccgttgg
GFP-Dbp5_FWD_478	gGCAgtgttaaaggattagaagcttgatatcgaattcc	GFP-Dbp5_REV_478	cctttaacacTGCcttaactattttttcgacttcatcccaatc
GFP-Dbp5_FWD_479	GCTttaaaggattagaagcttgatatcgaattcctgc	GFP-Dbp5_REV_479	taatcctttaaAGCtttcttaactattttttcgacttcatcccaatc
GFP-Dbp5_FWD_480	gGCAaaggattagaagcttgatatcgaattcctgc	GFP-Dbp5_REV_480	tctaatccttTGCcactttcttaactattttttcgacttcatc
GFP-Dbp5_FWD_481	GCTgattagaagcttgatatcgaattcctgcagc	GFP-Dbp5_REV_481	gcttctaatcAGCtaacactttcttaactattttttcgacttc
GFP-Dbp5_FWD_482	gGCTtagaagcttgatatcgaattcctgcag	GFP-Dbp5_REV_482	caagcttctaAGCctttaacactttcttaactattttttcg

## Sheet: Table 4
Table 4. Yeast Strains
Name	Genotype	Reference
BMY015	YPH500 (MATa ura3-52 lys2-801 ade2-101 trp1-Δ1 his3-Δ200 leu2-Δ1 dbp5Δ::HIS3 + [pCA5005])	Tseng et al. 1998
BMY830	YPH500 (MATa ura3-52 lys2-801 ade2-101 trp1-Δ1 his3-Δ200 leu2-Δ1dbp5Δ::HIS3 + [pBM464])	This study
BMY1000	W303 (MATa leu2-3,112 trp1-1 can1-100 ura3-1 ade2-1 his3-15 GFP-DBP5::URA3 + [pBM497])	This study
BMY1001	W303 (MATa leu2-3,112 trp1-1 can1-100 ura3-1 ade2-1 his3-15 GFP-dbp5-L12A::URA3 + [pBM497])	This study
BMY948	W303 (MATa leu2-3,112 trp1-1 can1-100 ura3-1 ade2-1 his3-15 DBP5::URA3)	This study
BMY950	W303 (MATa leu2-3,112 trp1-1 can1-100 ura3-1 ade2-1 his3-15 dbp5-L12A::URA3)	This study
BMY1092	W303 (MATa leu2-3,112 trp1-1 can1-100 ura3-1 ade2-1 his3-15 dbp5-R423A::URA3)	This study
BMY1742	W303 (MATa leu2-3,112 trp1-1 can1-100 ura3-1 ade2-1 his3-15 dbp5-L12A-R423A::URA3)	This study
BMY1650	BY4743 (MATa his3Δ1 leu2Δ0 lys2Δ0 met15Δ0 ura3Δ0 + [pBM394])	This study
BMY1652	BY4743 (MATa his3Δ1 leu2Δ0 lys2Δ0 met15Δ0 ura3Δ0 + [pBM541])	This study
BMY1651	BY4743 (MATa his3Δ1 leu2Δ0 lys2Δ0 met15Δ0 ura3Δ0 + [pBM504])	This study
BMY1653	BY4743 (MATa his3Δ1 leu2Δ0 lys2Δ0 met15Δ0 ura3Δ0 + [pBM542])	This study
BMY624	W303 (MATa leu2-3,112 trp1-1 can1-100 ura3-1 ade2-1 his3-15 xpo1Δ::LEU2 ­+[pKW711])	Scott et al., 2009
BMY1654	W303 (MATa leu2-3,112 trp1-1 can1-100 ura3-1 ade2-1 his3-15 xpo1Δ::LEU2 ­+[pKW711] +[pBM394])	This study
BMY1656	W303 (MATa leu2-3,112 trp1-1 can1-100 ura3-1 ade2-1 his3-15 xpo1Δ::LEU2 ­+[pKW711] +[pBM541])	This study
BMY1655	W303 (MATa leu2-3,112 trp1-1 can1-100 ura3-1 ade2-1 his3-15 xpo1Δ::LEU2 ­+[pKW711] +[pBM504])	This study
BMY1657	W303 (MATa leu2-3,112 trp1-1 can1-100 ura3-1 ade2-1 his3-15 xpo1Δ::LEU2 ­+[pKW711] +[pBM542])	This study
BMY647	W303 (MATα tor1-1 fpr1::NAT ade2-1 trp1-1 can1-100 leu2-3,112 his3-11,15 ura3 GAL psi+)	Haruki et al. 2008
BMY677	W303 (MATα tor1-1 fpr1::NAT ade2-1 trp1-1 can1-100 leu2-3,112 his3-11,15 ura3 GAL psi+ GFP-FRB-DBP5::URA3 HTB2-2x-FKBP12::HIS3)	This study
BMY1392	W303 (MATα tor1-1 fpr1::NAT ade2-1 trp1-1 can1-100 leu2-3,112 his3-11,15 ura3 GAL psi+ GFP-FRB-dbp5-R423A::URA3 HTB2-2x-FKBP12::HIS3)	This study
BMY676	W303 (MATα tor1-1 fpr1::NAT ade2-1 trp1-1 can1-100 leu2-3,112 his3-11,15 ura3 GAL psi+ GFP-FRB-DBP5::URA3 PEX25-2x-FKBP12::HIS3)	This study
BMY1099	W303 (MATα tor1-1 fpr1::NAT ade2-1 trp1-1 can1-100 leu2-3,112 his3-11,15 ura3 GAL psi+ GFP-FRB-dbp5ΔNES::URA3 PEX25-2x-FKBP12::HIS3	This study
BMY1357	W303 (MATα tor1-1 fpr1::NAT ade2-1 trp1-1 can1-100 leu2-3,112 his3-11,15 ura3 GAL psi+ GFP-FRB-DBP5::URA3 PEX25-2x-FKBP12::HIS3 xpo1-T539C::KANMX)	This study
BMY1328	W303 (MATa leu2-3,112 trp1-1 can1-100 ura3-1 ade2-1 DBP5::URA3)	This study
BMY1330	W303 (MATa leu2-3,112 trp1-1 can1-100 ura3-1 ade2-1 dbp5-L12A::URA3)	This study
BMY1332	W303 (MATa leu2-3,112 trp1-1 can1-100 ura3-1 ade2-1 dbp5-R423A::URA3)	This study
BMY217 / (Y7092)	BY4742 (MATα can1Δ::STE2pr-Sp_his5 lyp1Δ his3Δ1 leu2Δ0 ura3Δ0 met15Δ0)	Tong and Boone, 2007
BMY794	BY4742 (MATα can1Δ::STE2pr-Sp_his5 lyp1Δ his3Δ1 leu2Δ0 ura3Δ0 met15Δ0 dbp5-L12A::URA3)	This study
BMY1308	BY4742 (MATα can1Δ::STE2pr-Sp_his5 lyp1Δ his3Δ1 leu2Δ0 ura3Δ0 met15Δ0 dbp5-R423A::URA3)	This study
BMY1051	BY4741 (MATα his3Δ1 leu2Δ0 ura3Δ0 met15Δ0 ura10Δ::KANMX)	Li et al., 2011
BMY320	BY4741 (MATα his3Δ1 leu2Δ0 ura3Δ0 met15Δ0 mex67-5::KANMX)	Li et al. 2011
BMY333	BY4741 (MATα his3Δ1 leu2Δ0 ura3Δ0 met15Δ0 dbp5-1::KANMX)	Li et al. 2011
BMY344	BY4741 (MATα his3Δ1 leu2Δ0 ura3Δ0 met15Δ0 nup159-1::KANMX)	Li et al. 2011
BMY338	BY4741 (MATα his3Δ1 leu2Δ0 ura3Δ0 met15Δ0 gle1-4::KANMX)	Li et al. 2011
BMY009	BY4743 (MATa his3Δ1 leu2Δ0 lys2Δ0 met15Δ0 ura3Δ0)	Brachmann et al. 1998
BMY1335	BY4743 (MATa his3Δ1 leu2Δ0 lys2Δ0 met15Δ0 ura3Δ0 pProtA-TEV-His6-DBP5::NATMX)	This study
BMY1341	BY4743 (MATa his3Δ1 leu2Δ0 lys2Δ0 met15Δ0 ura3Δ0 pProtA-TEV-His6-dbp5-R423A::NATMX)	This study
BMY1903	BY4741 (MATα his3Δ1 leu2Δ0 ura3Δ0 met15Δ0 ura10Δ::KANMX + [pBM718])	This study
BMY1904	BY4741 (MATα his3Δ1 leu2Δ0 ura3Δ0 met15Δ0 mex67-5::KANMX + [pBM718])	This study
BMY1906	BY4741 (MATα his3Δ1 leu2Δ0 ura3Δ0 met15Δ0 nup159-1::KANMX) + [pBM718])	This study
BMY1907	BY4741 (MATα his3Δ1 leu2Δ0 ura3Δ0 met15Δ0 gle1-4::KANMX +pBM718)	This study
BMY1939	YPH500 (MATa ura3-52 lys2-801 ade2-101 trp1-Δ1 his3-Δ200 leu2-Δ1dbp5Δ::HIS3 + [pBM939]	This study
References:
Brachmann CB, Davies A, Cost GJ, et al (1998) Designer deletion strains derived from Saccharomyces cerevisiae S288C: a useful set of strains and plasmids for PCR-mediated gene disruption and other applications. Yeast 14:115–132. https://doi.org/10.1002/(SICI)1097-0061(19980130)14:2<115::AID-YEA204>3.0.CO;2-2
Haruki H, Nishikawa J, Laemmli UK (2008) The anchor-away technique: rapid, conditional establishment of yeast mutant phenotypes. Mol Cell 31:925–32. https://doi.org/10.1016/j.molcel.2008.07.020
Li Z, Vizeacoumar FJ, Bahr S, et al (2011) Systematic exploration of essential yeast gene function with temperature-sensitive mutants. Nat Biotechnol 29:361–7. https://doi.org/10.1038/nbt.1832
Scott RJ, Cairo L V., Van de Vosse DW, Wozniak RW (2009) The nuclear export factor Xpo1p targets Mad1p to kinetochores in yeast. J Cell Biol 184:21–29. https://doi.org/10.1083/jcb.200804098
Tong AH, Boone C (2006) Synthetic genetic array analysis in Saccharomyces cerevisiae. Methods Mol Biol 313:171–192
Tseng SS, Weaver PL, Liu Y, et al (1998) Dbp5p, a cytosolic RNA helicase, is required for poly(A)+ RNA export. EMBO J 17:2651–62. https://doi.org/10.1093/emboj/17.9.2651

## Sheet: Table 5
Table 5. Plasmids
Name	Description	Reference
pCA5005	pRS316-DBP5::URA3 (CEN plasmid)	Tseng et al., 1998
pBM464	pRS315-GFP-DBP5::LEU2 (CEN plasmid)	This study
pBM497	pRS315-NOP1-RFP-LEU2 (CEN plasmid)	Lapetina et al., 2017
pBM394	pRS316-NLSsv40-NESPKI-inactive-2xGFP::URA3 (CEN plasmid)	This study
pBM541	pRS316-NLSsv40-NESPKI-2xGFP::URA3 (CEN plasmid)	This study
pBM504	pRS316-NLSsv40-NESPKI-inactive-NESDBP5-2xGFP::URA3 (CEN plasmid)	This study
pBM542	pRS316-NLSsv40-NESPKI-inactive-NESdbp5-L12A-2xGFP::URA3 (CEN plasmid)	This study
pKW711	pRS313-xpo1-T539C::HIS3 (CEN plasmid)	Scott et al., 2009
pBM718	pRS315-GFP-dbp5-L12A::LEU2 (CEN plasmid)	This study
pBM939	pRS315-GFP-dbp5-L12A-R423A::LEU2 (CEN plasmid)	This study
References:
Lapetina DL, Ptak C, Roesner UK, Wozniak RW (2017) Yeast silencing factor Sir4 and a subset of nucleoporins form a complex distinct from nuclear pore complexes. J Cell Biol 216:3145 LP – 3159
Scott RJ, Cairo L V., Van de Vosse DW, Wozniak RW (2009) The nuclear export factor Xpo1p targets Mad1p to kinetochores in yeast. J Cell Biol 184:21–29. https://doi.org/10.1083/jcb.200804098
Tseng SS, Weaver PL, Liu Y, et al (1998) Dbp5p, a cytosolic RNA helicase, is required for poly(A)+ RNA export. EMBO J 17:2651–62. https://doi.org/10.1093/emboj/17.9.2651

## Sheet: Table 6
Table 6. qPCR primers, FISH probes, and Northern Probes
Name	Description	Sequence	Reference
Probe 1	tRNAIleUAU exon and intron, employed for Northern analyses	GGCACAGAAACTTCGGAAACCGAATGTTGCTATAAGCACGAAGCTCTAACCACTGAGCTACACGAGC	(Wu et al., 2015)
KC031	tRNATyr complementary to and exons and intron, employed for Northern analyses	CCCGATCTCAAGATTTCGTAGTGATAAATTACAGTCTTGCGCCTTAAACC	(Wu et al., 2015)
SRIM04	tRNAIleUAU mature sequence; employed for FISH	GTGGGGATTGAACCCACGACGGTCGCGTTATAAGCACGAAGCTCTAACCACTGAGCTACA3	(Wu et al., 2015)
SRIM15	tRNATyr mature sequence; employed for FISH	GCGAGTCGAACGCCCGATCTCAAGATTTACAGTCTTGCGCCTTAAACCAACTTGGCTACC	(Wu et al., 2015)
BMO861	tRNAIleUAU forward qPCR primer	GCTCGTGTAGCTCAGTGGTTAG	(Chatterjee et al., 2017)
BMO862	Un-spliced tRNAIleUAU reverse qPCR primer	CTTTTAAAGGCCTGTTTGAAAG	(Chatterjee et al., 2017)
BMO863	Spliced tRNAIleUAU reverse qPCR primer	ACGGTCGCGTTATAAGCACGA	(Chatterjee et al., 2017)
BMO1397	COX1 sense qPCR primer	AGGTGCTGGTACAGGGTGAA	This study
BMO1398	COX1 reverse qPCR primer	AGGTCCTGAATGTGCCTGAA	This study
References:
Chatterjee K, Majumder S, Wan Y, et al (2017) Sharing the load: Mex67–Mtr2 cofunctions with Los1 in primary tRNA nuclear export. Genes Dev 31:2186–2198. https://doi.org/10.1101/gad.305904.117
Wu J, Bao A, Chatterjee K, et al (2015) Genome-wide screen uncovers novel pathways for tRNA processing and nuclear-cytoplasmic dynamics. Genes Dev 29:2633–44. https://doi.org/10.1101/gad.269803.115
